# Two interacting transcriptional coactivators cooperatively control plant immune responses

Huan Chen<sup>1,2</sup>, Min Li<sup>2</sup>, Guang Qi<sup>2,3</sup>, Ming Zhao<sup>2</sup>, Longyu Liu<sup>2,4</sup>, Jingyi Zhang<sup>1,2</sup>, Gongyou Chen<sup>4</sup>, Daowen Wang<sup>3</sup>, Fengquan Liu<sup>1</sup>✉, and Zheng Qing Fu<sup>2</sup>✉

<sup>1</sup>Institute of Plant Protection, Jiangsu Academy of Agricultural Sciences, Jiangsu Key Laboratory for Food Quality and Safety-State Key Laboratory Cultivation Base of Ministry of Science and Technology, Nanjing, China

<sup>2</sup>Department of Biological Sciences, University of South Carolina, Columbia, SC, USA

<sup>3</sup>State Key Laboratory of Wheat and Maize Crop Science and College of Agronomy, Henan Agricultural University, Zhengzhou 450002, China

<sup>4</sup>School of Agriculture and Biology/State Key Laboratory of Microbial Metabolism, Shanghai Jiao Tong University, Shanghai 200240, China

✉Correspondence: [fqliu20011@sina.com](mailto:fqliu20011@sina.com); [zfu@mailbox.sc.edu](mailto:zfu@mailbox.sc.edu)

## Abstract

The phytohormone salicylic acid (SA) plays a pivotal role in plant defense against biotrophic and hemibiotrophic pathogens. Genetic studies have identified NPR1 and EDS1 as two central hubs in plant local and systemic immunity. However, it is unclear how NPR1 orchestrates gene regulation and whether EDS1 directly participates in transcriptional reprogramming. Here we show that NPR1 and EDS1 synergistically activate *Pathogenesis-Related (PR)* genes and plant defenses by forming a protein complex and co-opting with Mediator. In particular, we discover that EDS1 functions as an autonomous transcriptional coactivator with intrinsic transactivation domains and physically interacts with the CDK8 subunit of Mediator. Upon SA induction, EDS1 is directly recruited by NPR1 onto the *PR1* promoter via physical NPR1-EDS1 interactions, thereby potentiating *PR1* activation. We further demonstrate that EDS1 stabilizes NPR1 protein and NPR1 transcriptionally upregulates *EDS1* in plant-pathogen interactions. Our results reveal an elegant interplay of key coactivators with Mediator and elucidate novel molecular mechanisms for activating transcription during immune responses.

## Introduction

Plant-pathogen interactions have enabled plants to evolve a sophisticated and multifaceted immune system for defending against pathogen attacks<sup>1</sup>. Recognition of conserved pathogen-associated molecular patterns (PAMPs) by extracellular pattern recognition receptors in plants stimulates PAMP-triggered immunity (PTI). However, successful pathogens deploy a suite of virulence effectors to attenuate or dampen PTI, resulting in effector-triggered susceptibility. During host-pathogen coevolution, plants have developed resistance (R) proteins to specifically recognize pathogen-delivered effectors through direct interaction or indirect recognition by detecting the activities of pathogen effectors<sup>2</sup>, thus inducing a robust defense, termed effector-triggered immunity (ETI). Most R proteins belong to a large family of intracellular immune receptors known as nucleotide-binding (NB), leucine-rich repeat (LRR) receptor (NLR) proteins with a variable N terminal *Drosophila* Toll, mammalian interleukin-1 receptor (TIR)<sup>3</sup> or coiled-coil (CC) domain<sup>4</sup>. Activation of PTI or ETI results in the generation of mobile signals that are transported from local infected tissue to distal uninfected parts<sup>5</sup>, inducing systemic acquired resistance (SAR), which is a long-lasting and broad-spectrum resistance against related or unrelated pathogens<sup>6</sup>.

46 The plant defense hormone salicylic acid (SA), as a small phenolic compound, plays a pivotal  
47 role in plant defense against biotrophic pathogens such as the oomycete pathogen *Hyaloperonospora*  
48 *arabidopsis* and hemibiotrophic pathogens such as the bacterial pathogen *Pseudomonas syringae*<sup>7</sup>.  
49 Pathogen-induced SA not only accumulates in infected local leaves but also in uninfected systemic  
50 tissues. As a consequence, SA is an essential signaling molecule for the activation of local defense and  
51 SAR<sup>8-10</sup>. Exogenous application of SA or its active analogues is sufficient to activate plant defense  
52 responses by inducing massive transcriptional reprogramming to relocate energy for defense instead of  
53 growth<sup>11,12</sup>.

54 NONEXPRESSER OF PR GENES1 (NPR1) was identified through genetic screens for  
55 *Arabidopsis* mutants that cannot activate the expression of *PR* genes, which encode proteins with  
56 antimicrobial activities<sup>13</sup>. Similar to NPR3 and NPR4, NPR1 binds SA and functions as an SA  
57 receptor<sup>14-17</sup>. Before pathogen infection, NPR1 is sequestered in the cytosol as oligomers, which are  
58 crucial for protein homeostasis<sup>18</sup>. Upon pathogen challenge, oligomeric NPR1 is reduced into active  
59 monomers by SA-induced redox changes, and NPR1 monomers enter the nucleus<sup>19</sup>. As a  
60 transcriptional coactivator, NPR1 interacts with TGA and TCP transcription factors (TFs) and  
61 facilitates the expression of *PR* genes<sup>20-22</sup>. In addition to *PR* genes, NPR1 also controls the expression  
62 of the vast majority of other SA-responsive genes<sup>23</sup>. Therefore, it is believed that NPR1 functions as a  
63 master regulator of SA signaling.

64 ENHANCED DISEASE SUSCEPTIBILITY1 (EDS1) has been shown to be indispensable for  
65 TIR-NLR protein-dependent ETI, plant basal defense and SAR<sup>24-28</sup>. In addition to its association with  
66 numerous R proteins<sup>26</sup>, EDS1 physically interacts with PHYTOALEXIN DEFICIENT4 (PAD4) or  
67 SENESCENCE ASSOCIATED GENE101 (SAG101)<sup>29</sup>. Distinct EDS1-PAD4 and EDS1-SAG101  
68 complexes are essential for different R protein-mediated ETI<sup>30</sup>. EDS1 and its partners have been  
69 shown to affect the expression of numerous pathogen-responsive genes<sup>31</sup>, but it remains unclear how  
70 EDS1 promotes downstream transcriptional reprogramming to trigger a series of immune responses.

71 In this study, we show that NPR1 and EDS1 interact with each other to form a protein complex  
72 and synergistically activate plant immunity via SA signaling. We demonstrate that EDS1 possesses  
73 transcriptional activation activity and serves as an acidic transcriptional coactivator, which is directly  
74 involved in transcriptional reprogramming by interacting with a component of the Mediator complex,  
75 cyclin-dependent kinase 8 (CDK8). Moreover, we find that upon SA induction, NPR1 directly recruits  
76 EDS1 to the *PR1* promoter to facilitate the expression of *PR1*. Furthermore, we identify a positive  
77 feedback loop, in which NPR1 directly upregulates *EDS1* transcription and EDS1 stabilizes NPR1  
78 protein in plant-pathogen interactions. Our study revealed a unique mechanism, in which two  
79 interacting transcriptional coactivators co-opt with Mediator and cooperatively control transcriptional  
80 reprogramming to activate plant defense responses.

81

## 82 **Results**

83 **NPR1 physically interacts with EDS1 to form a protein complex.** Both NPR1 and EDS1 function  
84 as central hubs in plant immunity<sup>32,33</sup>, and they have also been identified as targets of pathogen  
85 effectors<sup>26,34</sup>. In a yeast-two hybrid (Y2H) screen, we have identified EDS1 as an NPR1 interactor.  
86 NPR1 specifically interacted with EDS1, but not with PAD4 or SAG101, two other members of the  
87 EDS1 family of lipase-like proteins in Y2H assays (Fig. 1a and Supplementary Fig. 1a). The specific  
88 NPR1-EDS1 interaction was then confirmed by *in vitro* pull-down assays, where Thioredoxin (Trx)-  
89 His<sub>6</sub>-NPR1 bound glutathione S-transferase (GST)-EDS1, but not GST-PAD4 or GST (Fig. 1b). Their  
90 interaction *in planta* was determined using co-immunoprecipitation (Co-IP) assays in *Nicotiana*  
91 *benthamiana*, in which EDS1-Myc was co-immunoprecipitated with NPR1-FLAG (Fig. 1c). Using a

92 bimolecular luminescence complementation (BiLC) assay in *N. benthamiana*, the *in planta* interaction  
93 between NPR1 and EDS1 was further confirmed (Fig. 1d). Taken together, these data demonstrate  
94 that NPR1 interacts with EDS1 *in vitro* and *in vivo*.

95 We next carried out a bimolecular fluorescence complementation (BiFC) assay to check the  
96 subcellular localization of NPR1-EDS1 complex by transiently expressing these two proteins in *N.*  
97 *benthamiana* using agroinfiltration. Compared with the EDS1-PAD4 complex that was detected  
98 mainly in the nucleus and cytoplasm, the observed NPR1 association with EDS1 in the nucleus  
99 apparently formed nuclear bodies (Fig. 1e), which most likely act as the sites for accelerating gene  
100 activation or repression<sup>35</sup>. These data imply that the primary function of the NPR1-EDS1 protein  
101 complex is to regulate the expression of plant defense genes. In order to validate the native NPR1-  
102 EDS1 interaction in *Arabidopsis*, we produced transgenic lines expressing the *EDS1* native promoter-  
103 driven EDS1-FLAG in Col-0 *eds1-2* mutant (*pEDS1:EDS1-FLAG/eds1-2*) and crossed it with  
104 *pNPR1:Myc-NPR1/npr1-3* transgenic lines to obtain the *pNPR1:Myc-NPR1/npr1-3; pEDS1:EDS1-*  
105 *FLAG/eds1-2* plants. In reciprocal Co-IP experiments, we detected that SA enhances the NPR1-EDS1  
106 association possibly due to the increased protein levels of NPR1 and EDS1 after SA treatment (Fig.  
107 1f). Altogether, these data suggest that SA induces the accumulation of NPR1-EDS1 protein complex  
108 within the nuclear bodies to facilitate the expression of plant defense genes.

109 We additionally conducted Y2H assays to identify the domain of EDS1 that is necessary for its  
110 interaction with NPR1. Several EDS1 fragments including the EP (EDS1 and PAD4-defined) domain,  
111 the Lipase-like domain, the helical region encompassing amino acid residues from 310 to 350 (310-  
112 350), and a coiled-coil domain (358-383) (Supplementary Fig. 1b) were tested based on the secondary  
113 and crystal structures<sup>25,29</sup>. The results showed that the helical region (310-350) is sufficient and  
114 necessary for EDS1 to interact with NPR1. To narrow down the interacting region in the helical  
115 structure, we divided it into two alpha helices (310-330 and 331-350). EDS1 lacking residues 310 to  
116 330 ( $\Delta$ 310-330) failed to interact with NPR1, while the minimal region (310-330) exhibited obvious  
117 interaction. Therefore, the minimal alpha helix (310-330) in EDS1 is necessary and sufficient for the  
118 interaction with NPR1. Based on the crystal structure of EDS1<sup>29</sup>, this minimal alpha helix (310-330) is  
119 located on the surface of the N-terminal domain of EDS1 (Supplementary Fig. 1c), further supporting  
120 the critical role of this region for EDS1-NPR1 interaction.

121 Conversely, we also generated different truncations of NPR1 and identified several domains of  
122 NPR1 that are involved in NPR1-EDS1 interaction (Supplementary Fig. 1d,e). Intriguingly, we found  
123 that the BTB/POZ (for Broad complex, Tramtrack, and Bric-a-brac/Pox virus and Zinc finger)  
124 domain, the ankyrin repeats (ANK) and an important C-terminal domain (CTD) interact with EDS1 in  
125 Y2H assays. BTB/POZ and ANK motifs are well known as protein-protein interaction motifs in a  
126 number of proteins in mammals and plants<sup>13,36,37</sup>. To further decipher whether the interaction of NPR1  
127 with EDS1 is relevant to NPR1's function, we investigated the interaction of EDS1 with mutant *npr1*  
128 protein encoded by several *npr1* alleles (i.e., *npr1-2*, *nim1-2*, *npr1-1*, and *npr1-5*) that are  
129 compromised in SA signaling and SAR induction<sup>38-41</sup>. Consistently, *npr1-2* (C150Y) mutation in BTB  
130 domain or other point mutations in ANK region such as *nim1-2* (H300Y), *npr1-1* (H334Y) and *npr1-5*  
131 (P342S) completely lost the ability to interact with EDS1 (Supplementary Fig. 1d), indicating that the  
132 interaction of EDS1 with NPR1 is important for the function of NPR1. In addition, it has been  
133 revealed that the CTD overlapping a repression region of NPR1<sup>22</sup> is probably involved in SA  
134 perception<sup>16,42</sup>. Collectively, these findings suggest that multiple regions of NPR1 are required for the  
135 dynamic interaction with EDS1 in plant immune responses.

136

137 **NPR1 and EDS1 cooperatively activate plant immunity.** EDS1 plays an essential role in ETI  
138 triggered by TIR-NLR proteins<sup>24</sup>. EDS1 is required for recognition of the *Pseudomonas syringae* pv.  
139 tomato avirulence effector Rps4 (*Pst* AvrRps4) by the nuclear R protein pair RESISTANT TO  
140 RALSTONIA SOLANACEARUM1S (RRS1S)-RESISTANT TO PSEUDOMONAS SYRINGAE  
141 (RPS4)<sup>43</sup>. To dissect the roles of the NPR1-EDS1 interaction in controlling plant immunity, genetic  
142 interactions were analyzed between recessive *npr1* mutant alleles (*npr1-2* and *npr1-3*)<sup>13</sup> and the null  
143 *eds1-2* allele<sup>31</sup> in the *Arabidopsis thaliana* ecotype Col-0 background. In comparison to *eds1-2*, the  
144 *npr1-2* and *npr1-3* are moderately susceptible to *Pst* DC3000 *avrRps4*, whereas two homozygous  
145 transgenic lines overexpressing N-terminal green-fluorescent protein (GFP) tagged NPR1 (35S:*GFP*-  
146 *NPR1* #11 and #36) were robustly resistant to the avirulent pathogen (Fig. 2a). This suggests that  
147 NPR1 prominently contributes to RRS1S/RPS4-mediated ETI. To further test the function of nuclear  
148 NPR1 in ETI, we examined the resistance of the transgenic plants expressing *NPR1-GFP* and its  
149 nuclear localization signal (NLS) mutant form *NPR1 (nls)-GFP* to *Pst* DC3000 *avrRps4*. As shown in  
150 Supplementary Fig. 2a, the enhanced ETI conferred by *NPR1-GFP* was completely lost in *NPR1*  
151 (*nls*)-*GFP* transgenic plants, revealing that nuclear NPR1 contributes to ETI likely through  
152 transcriptional regulation.

153 In further epistasis analysis, the double mutants (*npr1-2 eds1-2* and *eds1-2 npr1-2*) obtained from  
154 two reciprocal crosses (*npr1-2* × *eds1-2* and *eds1-2* × *npr1-2*) were more susceptible to *Pst* DC3000  
155 *avrRps4* and *Pst* DC3000 than either *npr1-2* or *eds1-2* single mutants (Fig. 2b), demonstrating that  
156 NPR1 and EDS1 additively contribute to ETI and basal resistance. To determine whether EDS1 is  
157 involved in NPR1-mediated defense pathways, *NPR1-GFP/npr1-2* transgenic plants were crossed  
158 with *eds1-2* mutants and homozygous *NPR1-GFP/npr1-2;eds1-2* plants were identified and analyzed.  
159 *NPR1-GFP/npr1-2;eds1-2* plants exhibit a susceptibility somewhat less than that conferred by *eds1-2*  
160 (Supplementary Fig. 2b), suggesting that EDS1 functions both dependently and independently of  
161 NPR1 to regulate ETI. To further confirm the function of NPR1-EDS1 interaction in plant defense, we  
162 examined the susceptibility of these mutants to another avirulent pathogen *P. syringae* pv. *maculicola*  
163 (*Psm*) ES4326 *avrRpt2*, which activates ETI mediated by the CC-NLR protein RPS2 (ref.<sup>44</sup>). We  
164 found that the growth of *Psm* ES4326 *avrRpt2* in *eds1-2* is not significantly higher than wild-type  
165 plants. However, the pathogen growth in *npr1-2 eds1-2* or *eds1-2 npr1-2* was higher than either *npr1-2*  
166 or *eds1-2* (Supplementary Fig. 2c), indicating the cooperative contributions of NPR1 and EDS1 in  
167 RPS2-mediated ETI. Thus, these genetic interaction data are consistent with the hypothesis that NPR1  
168 and EDS1 function as partners in diverse immune responses.

169 In addition to genetic interactions, the molecular function of the NPR1-EDS1 interaction was  
170 investigated. We used real-time quantitative PCR (qPCR) to monitor the time course expression of *PR*  
171 genes (*PR1*, *PR2*, and *PR5*), a subset of EDS1-induced *WRKY* genes and two EDS1-repressed genes  
172 (*DND1* and *ERECTA*) in ETI<sup>31,45</sup>. These *PR* genes and EDS1 target genes were mis-regulated in *npr1-2*  
173 and *eds1-2* in similar manners (Fig. 2c and Supplementary Fig. 2d). Interestingly, loss of *EDS1*  
174 function has a stronger effect than loss of *NPR1* function on expression of *PR* genes after pathogen  
175 infection (Fig. 2c), consistent with our bacterial growth data (Fig. 2a and Supplementary Fig. 2b).  
176 Importantly, the reduction in the expression of *PR* genes in the *npr1-2 eds1-2* was more pronounced  
177 than single mutants (Fig. 2c, right). These results indicate that the synergistic regulation of defense  
178 gene expression by NPR1 and EDS1 is essential for immune responses.

179  
180 **NPR1 and EDS1 synergistically promote plant defenses via SA signaling.** EDS1 can function  
181 upstream of SA in plant immunity because EDS1 contributes to pathogen-induced SA accumulation<sup>46</sup>.  
182 PR proteins have been considered as hallmarks of SA signaling<sup>38,47,48</sup>. Notably, the *eds1-2* mutation

183 strongly inhibited *Pst* DC3000 *avrRps4*-induced *PR* gene expression (Fig. 2c); thus, EDS1 may also  
184 function downstream of SA. To study potential roles of EDS1 in SA signaling, the induction of *PR*  
185 genes in response to exogenous SA was examined in two *eds1* mutant alleles. The result from qPCR  
186 analysis showed that the expression of SA-induced *PR* genes was significantly decreased in the *eds1-2*  
187 rosette leaves from soil-grown plants and seedlings (Supplementary Figs. 3a,b). Moreover, SA-  
188 induced *PR1* protein accumulation in Ws-0 *eds1-1* or Col-0 *eds1-2* was significantly attenuated and  
189 delayed (Fig. 3a), compared to the corresponding wild-type plants. Concomitantly, the gradually  
190 increased EDS1 protein over time was highly elevated by SA (Fig. 3a). Hence, the SA-induced EDS1  
191 indeed plays a positive role in SA signaling to activate defense genes. We also examined SA-induced  
192 pathogen resistance in *eds1* mutants. In contrast to *npr1-2* plants, exogenous application of SA  
193 significantly rendered *eds1-1* and *eds1-2* plants resistant to *Pst* DC3000 (Fig. 3b), consistent with the  
194 idea that EDS1 functions upstream of SA. However, the SA-induced pathogen resistance in *eds1-1* or  
195 *eds1-2* was not as strong as that in wild-type plants (Fig. 3b). These findings are in agreement with  
196 our conclusion that EDS1 can function as a positive regulator of SA signaling in immune responses.

197 To investigate the functions of the NPR1-EDS1 interaction in SA signaling, we examined the  
198 expression of other SA-responsive and NPR1 target genes in *eds1-2* mutant. In addition to NPR1-  
199 dependent *PR* genes (Fig. 3a and Supplementary Fig. 3a,b), some *WRKY* genes, as well as several  
200 genes involved in pathogen-induced SA accumulation were significantly reduced in *eds1-2* compared  
201 with Col-0 after SA treatment (Supplementary Fig. 3c), suggesting that EDS1 and NPR1 upregulate  
202 the expression of a common set of SA-induced genes. To determine the contribution of EDS1 to the  
203 *PR* gene expression in the absence of NPR1, the expression of both *PR1* and *PR2* was examined in  
204 *npr1-2 eds1-2* in response to SA. Remarkably, the expression of *PR1* and *PR2* were dramatically  
205 reduced in *npr1-2 eds1-2* seedlings (Fig. 3c), compared to *npr1-2* or *eds1-2* seedlings. Strikingly, the  
206 fold change for the reduction of *PR1* expression in *npr1-2 eds1-2* (112.0-fold) was much greater than  
207 the product of the fold change in *npr1-2* (13.1-fold) and *eds1-2* (3.3-fold). Similar results were found  
208 with seedlings that were grown on media containing low concentrations of SA for a long-term  
209 treatment (Supplementary Fig. 3d). Therefore, these results demonstrate that NPR1-EDS1 interaction  
210 synergistically activates SA-mediated defense and pathogen resistance.

211  
212 **The NPR1-EDS1 complex associates with specific chromatin regions upon SA induction.** To  
213 further explore the effects of NPR1-EDS1 complex on the expression of defense genes, we conducted  
214 a series of chromatin immunoprecipitation (ChIP) assays. Multiple NPR1-interacting TGA factors<sup>49-51</sup>  
215 and numerous *WRKY* TFs, that bind specifically to the W-box motif (TTGACC/T), have been shown  
216 to play essential roles in plant defense<sup>52-54</sup>. Based on these studies, we chose a set of promoter  
217 fragments that contain the common TGA motif (TGACG), the preferred TGA2-binding motif  
218 (TGACTT)<sup>16</sup>, or the W-box in our ChIP assays. As shown in Fig. 4a, Myc-NPR1 specifically  
219 associates with chromatin fragments at the *PR1* promoter in *pNPR1:Myc-NPR1/npr1-3* transgenic  
220 plants after SA treatment. In contrast, Myc-NPR1 did not significantly associate with the *PR1*  
221 promoter in the absence of SA, probably owing to constitutive protein degradation<sup>55</sup> and the persistent  
222 existence of cytosolic oligomers under noninducing conditions<sup>18</sup>. Surprisingly, EDS1-FLAG in  
223 *pEDS1:EDS1-FLAG/eds1-2* transgenic lines and Myc-NPR1 bind almost identical sites on the *PR1*  
224 promoter (Fig. 4a). Moreover, NPR1 and EDS1 associated with the promoters of *PR2* and *PBS3* with  
225 similar enrichment profiles especially after SA treatment (Supplementary Fig. 4a,b). Together, these  
226 results demonstrate that EDS1 is a chromatin-associated protein and the NPR1-EDS1 complex  
227 associates with specific chromatin regions upon SA induction.

228 Given that the chromatin binding of EDS1 was strongly enhanced by SA (Fig. 4a), we next tested  
229 whether SA contributes to the nuclear translocation of EDS1 using *35S:EDS1-eGFP/eds1-2* transgenic  
230 plants, which constitutively express EDS1 fused with enhanced GFP (eGFP) in the *eds1-2*  
231 background. After SA treatment, we found that neither the accumulation of constitutively expressed  
232 EDS1-eGFP protein (Supplementary Fig. 4c) nor its nuclear import (Supplementary Fig. 4d) was  
233 apparently induced by SA, in agreement with the finding from another parallel experiment using  
234 *35S:GFP-EDS1/eds1-2* plants (Supplementary Fig. 4e). Thus, SA does not facilitate nuclear  
235 translocation of EDS1. It is worthwhile to mention that endogenous EDS1 protein in nuclei is  
236 obviously induced by SA (Supplementary Fig. 4f), which is attributed to the fact that the total EDS1  
237 protein expression is enhanced by SA (Figs. 1f and 3a). These data indicate that the accumulation of  
238 nuclear EDS1 is required for SA-triggered chromatin binding by EDS1.

239  
240 **EDS1 functions as a transcriptional coactivator with acidic activation domains.** In view of the  
241 potential autoactivation of EDS1 observed in Y2H system (Supplementary Fig. 4g), we speculated  
242 that EDS1 has transcriptional activator activity. To confirm this, we detected transcriptional activation  
243 activity using a yeast monohybrid assay, in which GAL4 DNA binding domain (GAL4 DBD) fusion  
244 proteins were transformed into a yeast strain carrying GAL4 promoter-dependent reporter genes<sup>56,57</sup>.  
245 Based on *HIS3*, *MEL1*, and *lacZ* reporter assays (Fig. 4b), we found that full-length EDS1 and TGA3  
246 have transcriptional activation activities in contrast to the GAL4 DBD empty vector, PAD4, and  
247 TGA2 (Fig. 4b, top). A more in-depth N-terminal and C-terminal deletion analysis identified two  
248 transcriptional activation domains (TADs) located at the  $\alpha$ -helical region (331-350) and the C-  
249 terminal region (542-593) that are either necessary or sufficient for the transactivation activity of  
250 EDS1, respectively (Fig. 4b). Acidic activation domains (AAD), also known as “acidic blobs”, play  
251 essential roles in the functions of important transcriptional activators such as p53, GCN4, GAL4, and  
252 VP16<sup>58-61</sup>. The acidic amino acids and surrounding hydrophobic residues within AAD have been  
253 shown to be critical structural elements for AAD and they are presumably involved in both ionic and  
254 hydrophobic interactions with AAD’s target molecules<sup>61</sup>. Importantly, we found that acidic and  
255 hydrophobic amino acids are enriched in the TADs of EDS1 (Fig. 4b, bottom), indicating that EDS1 is  
256 a transcriptional activator with AADs. Taken together, EDS1 harbors two AADs and has  
257 transcriptional activator function.

258 To further analyze the activator function of EDS1 *in planta*, we investigated the transcriptional  
259 regulation of defense genes by EDS1 using *35S:EDS1-eGFP/eds1-2* transgenic plants. In the  
260 transactivation experiments, EDS1-eGFP alone had no effect on gene transcription without SA  
261 treatment, but it significantly induced the expression of *PR1* (Fig. 4c) and other defense genes (i.e.,  
262 *PR2*, *PR5*, *PAD4* and *PBS3*) in the presence of SA (Supplementary Fig. 4h). Additionally, EDS1  
263 likely binds to defense gene promoters through intermediate transcriptional regulators owing to lack  
264 of a DNA-binding domain<sup>25</sup>. Taken together with the above ChIP and yeast results, these data  
265 demonstrate that EDS1 can bind chromatin and acts as a transcriptional coactivator to activate  
266 defense genes upon SA induction.

267  
268 **EDS1 strongly interacts with Mediator.** Mediator complex has emerged as a key transcriptional  
269 regulator linking different transcription activators and RNA polymerase II (RNAPII) preinitiation  
270 complex<sup>62</sup>. CDK8 is a key component in the kinase module (CDK8 module) of the Mediator complex.  
271 Increasing studies have demonstrated that CDK8 can play positive roles in gene activation in  
272 mammalian and plant cells<sup>63,64</sup>. Of note, we have shown the significant association of plant CDK8  
273 with NPR1 in plants and several components of the CDK8 module positively regulating SA signaling

274 in SAR<sup>65</sup>. To further investigate the mechanism for EDS1-mediated transactivation, we examined the  
275 possible association of CDK8 with EDS1 by Co-IP assays. We observed that EDS1 associates with  
276 CDK8 in plants (Fig. 4d). To test whether EDS1 physically interacts with CDK8, a reciprocal Y2H  
277 assay was used and the direct EDS1-CDK8 interaction was confirmed (Fig. 4e). Moreover, the EDS1  
278 ( $\Delta$ 331-350) deletion mutant is unable to interact with CDK8 (Fig. 4e), suggesting this TAD of EDS1  
279 confers to the interaction with Mediator. These results further support that EDS1 can function as a  
280 transcriptional coactivator, which is mediated by interacting with Mediator complex in regulating  
281 RNAPII for pathway-specific transcription.

282 Furthermore, we explored the action of the TAD (331-350) and the NPR1-interacting domain  
283 (310-330) of EDS1 (Supplementary Fig. 1b) in defense responses through examining the PR1  
284 expression potentially affected by these EDS1 mutations. Notably, these regions are not highly  
285 conserved in PAD4 or SAG101 (Supplementary Fig. 4g). Compared with full-length *EDS1-eGFP*, the  
286 accumulation of PR1 was compromised by constructs expressing *EDS1* ( $\Delta$ 310-330)-*eGFP* or *EDS1*  
287 ( $\Delta$ 331-350)-*eGFP* driven by a constitutive 35S promoter in Col *eds1-2* plants (Fig. 4f). Therefore,  
288 these distinct domains of EDS1 are important for reprogramming gene expression in plant defense.

289

290 **EDS1 is directly recruited by NPR1 onto the *PR1* Promoter via a physical NPR1-EDS1**  
291 **interaction.** As shown above, EDS1 and NPR1 occupy the same chromatin loci and synergistically  
292 activate plant defense genes (Figs. 2c, 3c and 4a), supporting that EDS1 is a functional NPR1 cofactor  
293 in SA-mediated gene regulation. To further explore the effects of SA and NPR1-EDS1 complex on  
294 the enrichment of NPR1 and EDS1 at the *PR1* promoter, we performed a series of ChIP and cell  
295 fractionation experiments using different transgenic plants constitutively expressing EDS1-eGFP or  
296 NPR1-GFP in diverse genetic backgrounds.

297 First, we determined whether the interaction of NPR1 and EDS1 affected the recruitment of  
298 NPR1 and/or EDS1 to the *PR1* promoter. In the ChIP experiments using *35S:EDS1-eGFP/eds1-*  
299 *2;npr1-2* and *35S:EDS1-eGFP/eds1-2* transgenic lines, *npr1-2* greatly suppressed the occupancy of  
300 EDS1-eGFP at specific sites on the *PR1* promoter (Fig. 5a), suggesting that NPR1 is essential for the  
301 association of EDS1 with the *PR1* promoter after SA treatment. In contrast, EDS1 appears to only  
302 slightly affect NPR1-GFP residence on the *PR1* promoter based on assays using *35S:NPR1-*  
303 *GFP/npr1-2* and *35S:NPR1-GFP/npr1-2;eds1-2* lines (Supplementary Fig. 5a). These findings  
304 indicate that NPR1 is indispensable for EDS1 recruitment at the *PR1* promoter, but not vice versa.

305 Next, we sought to examine the effects of SA and NPR1 on recruiting EDS1 to the *PR1* promoter.  
306 Similar to the results obtained with *pEDS1:EDS1-FLAG/eds1-2* lines (Fig. 4a), the EDS1-eGFP  
307 enrichment at the *PR1* promoter in *35S:EDS1-eGFP/eds1-2* line was also dependent on SA (Fig. 5a).  
308 Since SA did not increase the levels of EDS1-eGFP (Supplementary Fig. 4c) or its nuclear  
309 translocation (Supplementary Fig. 4d,e), we believe that regulation of nuclear EDS1 by SA is critical  
310 for its association with the *PR1* promoter. Notably, our cell fractionation assays demonstrated that  
311 neither the EDS1-eGFP expression (Supplementary Fig. 5b) nor its nuclear translocation was  
312 promoted by NPR1 after SA treatment (Supplementary Fig. 5c), significantly ruling out the possibility  
313 that NPR1 facilitates the nuclear movement of EDS1 upon SA induction. Note that the association of  
314 NPR1 with chromatin on the *PR1* promoter was dependent on SA (Fig. 4a). Taken together, these  
315 results indicate that SA-induced association of NPR1 with chromatin is crucial for the SA-triggered  
316 EDS1 recruitment onto *PR1* promoter, which is independent of the nucleocytoplasmic trafficking of  
317 EDS1.

318 We next focused on investigating the mechanisms utilized by NPR1 in recruiting EDS1 onto the  
319 *PR1* promoter. The TGA2 subclade TFs, the major regulators of NPR1-mediated SAR and expression

of *PR* genes<sup>51</sup>, are implicated in the recruitment of NPR1 onto the *PR1* promoter<sup>20,66</sup>. NPR1 and EDS1 were enriched at the chromatin site F4 region containing *activation sequence-1 (as-1)*-like *cis*-elements on the *PR1* promoter (Fig. 4a), an important region for basal and SA-induced *PR1* expression<sup>67</sup>. The SA-responsive *as-1* region is proposed to be occupied by constitutive *trans*-acting factors such as the TGA2/5 and additional factors in the uninduced state<sup>66-68</sup>. Since the constitutively expressed EDS1-eGFP in the nucleus (Supplementary Fig. 4d-f) did not reside at the *PR1* promoter in uninduced states (Fig. 5a), this deduces that EDS1 might not be recruited by the aforementioned *trans*-acting factors. Most importantly, *npr1-2* mutation completely abolished an association of EDS1-eGFP with the F4 (*as-1*) region upon SA induction (Fig. 5a) and EDS1 was not shown to physically interact with TGA2/5 by Y2H assays (Supplementary Fig. 5d), further emphasizing that the direct recruitment of EDS1 onto the *PR1* promoter is predominantly dependent on the physical NPR1-EDS1 interaction.

Based on the above results, we conclude that NPR1 directly recruits EDS1 to the *PR1* promoter, which is crucial for SA-induced EDS1 chromatin binding and *PR1* activation. Consistently, the enhanced activation of *PR1* and other defense genes in the *35S:EDS1-eGFP/eds1-2* plants upon SA induction is significantly compromised by the *npr1-2* mutation (Fig. 4c and Supplementary Fig. 4h), suggesting that EDS1 cooperates with NPR1 for potentiation of *PR1* expression. This proposition is in line with the immunoblot results showing that NPR1 is required for the accumulation of PR1 protein induced by EDS1-eGFP (Fig. 5b). Overall, EDS1 is directly recruited by NPR1 and participates in transcriptional reprogramming with Mediator complex, and therefore reinforces SA-mediated defense responses.

**NPR1 transcriptionally upregulates *EDS1*.** Because EDS1 is apparently induced by SA (Figs. 1f and 3a), we speculate that NPR1 regulates *EDS1* expression. To test this hypothesis, we examined the dynamic expression of EDS1 protein in *npr1-2* and *npr1-3* mutants at different time points. As anticipated, SA-induced EDS1 protein level was obviously reduced in *npr1-2* (Fig. 6a) or *npr1-3* mutants (Supplementary Fig. 6a). SA-upregulated *EDS1* transcript level was also significantly diminished in *npr1-2* (Fig. 6b) or *npr1-3* mutants (Supplementary Fig. 6b), compared with the wild-type control. Therefore, NPR1 preferentially upregulates *EDS1* transcription. Additional ChIP assays demonstrated the SA-dependent association of NPR1-GFP with the *EDS1* promoter at TGA motifs (Fig. 6c, top). Thus, NPR1 directly activates *EDS1* transcription upon SA induction. Since TGA2-NPR1 complex is crucial for *PR1* activation<sup>22,51</sup>, we further test whether the TGA2 also directly targets the *EDS1* promoter. ChIP experiments showed that TGA2-GFP strongly associated with two TGA motifs within the *EDS1* promoter (Fig. 6c, bottom). These data suggest that TGA2-NPR1 complex directly activates *EDS1*.

**EDS1 Protein Stabilizes NPR1 Protein.** In *Arabidopsis*, NPR1 protein is ubiquitously turned over by proteasome-mediated protein degradation and moderately regulated by gene regulation<sup>33,55,65</sup>. We asked whether EDS1 regulates NPR1 at the transcriptional or translational level. In the dynamic expression assays, the basal and SA-induced NPR1 protein levels were significantly reduced in *eds1-2*, compared with wild-type control (Fig. 6d and Supplementary Fig. 6c,e). However, *NPR1* transcript level in *eds1-2* was comparable to that in control plants (Fig. 6e and Supplementary Fig. 6d), albeit unexpectedly increased at 3 h after SA treatment. These results strongly indicate that EDS1 post-transcriptionally regulates NPR1. To further investigate whether EDS1 stabilizes the NPR1 protein, we compared protein levels of the constitutively expressed NPR1-GFP in *35S:NPR1-GFP/npr1-2* and *35S:NPR1-GFP/npr1-2;eds1-2* transgenic lines. In *35S:NPR1-GFP/npr1-2;eds1-2* plants, there were



366 reduced levels of NPR1-GFP protein, which could be restored in the presence of the 26S proteasome  
367 inhibitor MG115 (Fig. 6f). We then analyzed EDS1 protein stability using cycloheximide, a potent  
368 protein synthesis inhibitor. In a full cycloheximide-chase assay, *eds1-2* mutation significantly  
369 accelerated the decay of uninduced NPR1-GFP protein (Fig. 6g) and strongly improve the decay of  
370 SA-induced NPR1-GFP protein (Fig. 6h). In contrast, *npr1-2* mutation did not affect cycloheximide-  
371 resistant GFP-EDS1 or EDS1-eGFP (Supplementary Fig. 6f,g), consistent with above finding that  
372 NPR1 preferentially regulates *EDS1* transcription. These results provide compelling evidence that  
373 EDS1 stabilizes NPR1 in order to maintain an optimal NPR1 threshold for plant defense responses.

374 The SA receptors NPR3 and NPR4 were proposed to be the adaptors of a Cullin3-based E3 ligase  
375 and promote the degradation of NPR1, EDS1, and JAZ proteins<sup>17,69,70</sup>. We further examined the  
376 biochemical basis underlying the NPR1 homeostasis regulated by EDS1. In Co-IP assays, GFP-NPR3  
377 and GFP-NPR4 were efficiently immunoprecipitated with NPR1-FLAG (Fig. 6i and Supplementary  
378 Fig. 6h). However, expression of EDS1-Myc protein diminished the amount of NPR1-FLAG bound to  
379 GFP-NPR3/NPR4 (Fig. 6i). These results indicate that EDS1 competes with NPR3/NPR4 for NPR1  
380 interaction, thereby stabilizing NPR1 in plant cells.

381

382 **NPR1 is stabilized by EDS1 during ETI to confer a robust defense.** To decipher the mechanism  
383 underlying the regulation of NPR1 stability in plant-pathogen interactions, we first investigated the  
384 accumulation of NPR1 protein in response to virulent and avirulent pathogen challenges. Time-course  
385 expression analyses showed that infection with avirulent *Pst* DC3000 *avrRps4* induced NPR1 protein  
386 more strongly than inoculation by virulent *Pst* DC3000 (Fig. 6j, left), which obviously differs from  
387 the gene transcription patterns (Fig. 6j, right). These results demonstrate that NPR1 protein rather than  
388 its transcript hyperaccumulates during RRS1S/RPS4-activated ETI, suggesting that ETI preserves  
389 NPR1.

390 Although ETI slightly enhanced the induction of *NPR1* transcription (Fig. 6j, right) to compensate  
391 for the degradation of NPR1 promoted by *Pst* DC3000 in *35S:NPR1-GFP/npr1-2* transgenic plants  
392 (Fig. 6k), it is reasonable to speculate that ETI prevents NPR1 degradation. As anticipated, we found  
393 that the destruction of NPR1-GFP protein caused by *Pst* DC3000, as reported previously<sup>34</sup>, was  
394 apparently restored by *Pst* DC3000 *avrRps4* (Fig. 6k), further supporting that ETI prevents NPR1  
395 degradation. Moreover, the *eds1-2* mutation impeded the recovery of NPR1-GFP protein by *Pst*  
396 DC3000 *avrRps4* in *35S:NPR1-GFP/npr1-2;eds1-2* lines (Fig. 6k), indicating the prevention of NPR1  
397 degradation by ETI occurred in an EDS1-dependent manner. Consistent with the above results, these  
398 findings confirm that EDS1 protects NPR1 from degradation in plant-pathogen interactions.

399

## 400 Discussion

401 Genetic studies have identified several important positive regulators of plant immunity, including  
402 NPR1 (ref.<sup>38</sup>), EDS1 (ref.<sup>25</sup>), PAD4 (ref.<sup>40</sup>), NDR1 (ref.<sup>71</sup>), PBS3 (ref.<sup>72</sup>), EDS5 (ref.<sup>73</sup>), and EPS1  
403 (ref.<sup>74</sup>). Among them, the transcriptional regulator NPR1 has been known as the master regulator of  
404 SA signaling and SAR<sup>13,41,75</sup>. However, the mechanisms of NPR1-mediated transcriptional  
405 reprogramming are still poorly understood. EDS1 is required for plant basal defense, TIR-NLR-  
406 mediated ETI and SAR<sup>25,28</sup> and regulates the expression of a large number of defense-related genes<sup>31</sup>.  
407 Nonetheless, how EDS1 activates downstream plant defense genes remains obscure.

408 In the present study, we have shown the functionally physical and genetic interactions between  
409 two key immune regulators for the synergistical control of plant immune responses. The proposed  
410 model is illustrated in the Supplementary Fig. 6i. We provide the first evidence suggesting that EDS1  
411 is capable of acting as a transcriptional coactivator, which cooperates with NPR1 and Mediator in the

412 transcription machinery for enhancing activation of defense genes upon immune induction. Interaction  
413 between two coactivators promotes direct recruitment of EDS1 onto promoters and influences the  
414 homeostasis of protein by stabilizing NPR1. We have elucidated an elaborate positive-feedback  
415 regulation of NPR1 and EDS1 by distinct mechanisms for amplifying defense responses.

416 EDS1 was classified as a lipase-like protein<sup>25,29</sup>, but subsequent biochemical and structural  
417 studies showed that EDS1 has no lipase activity<sup>29,76</sup>. Our study demonstrates that EDS1 serves as a  
418 transcriptional coactivator based on the following criteria. First, EDS1 binds chromatin regions in a  
419 stimulus-specific manner (Fig. 4a and Supplementary Fig. 4a,b) and directly interacts with the  
420 transcriptional coactivator NPR1 (Fig. 1a-f). Second, EDS1 possesses transactivation activity and  
421 contains two intrinsic TADs (Fig. 4b). We further found that acidic and hydrophobic amino acids are  
422 overrepresented within EDS1's two discrete TADs (Fig. 4b, bottom), indicating that EDS1 is a  
423 transcriptional activator with AADs. In addition, EDS1 activates many defense genes in response to  
424 SA (Fig. 4c and Supplementary Figs. 3a-c and 4h). Furthermore, one TAD of EDS1 directly interacts  
425 with a subunit of the Mediator (i.e., CDK8) (Fig. 4d,e), further indicating that EDS1 is a  
426 transcriptional activator that recruits Mediator complex in the transcription machinery. Since EDS1  
427 itself likely does not bind chromosomal DNA directly<sup>25</sup>, these findings strongly support that EDS1 is  
428 a bona fide transcriptional coactivator. It is worthwhile to mention that all previously reported AADs  
429 were identified in transcription activators with a DNA binding domain<sup>57-60</sup>. For the first time, we have  
430 shown that EDS1, a transcriptional coactivator without a DNA binding domain, possesses two discrete  
431 AADs. Therefore, our study may shed light on the functions of transcriptional coactivators in general.  
432 Mechanistically, EDS1 is directly recruited to the specific SA-responsive *cis*-elements on *PR1*  
433 promoter by NPR1 and works together with NPR1, thus enhancing *PR1* transcription in SA-mediated  
434 defense (Fig. 5a,b and Supplementary Fig. 6i). Interestingly, apart from associating with TGA motif-  
435 containing chromatin regions, EDS1 has also been shown to reside at the promoter regions containing  
436 W-box *cis*-elements in a similar manner to NPR1 (Fig. 4a and Supplementary Fig. 4a,b). Consistently,  
437 several WRKY factors have been shown to interact with NPR1<sup>65,77</sup>. Given that multiple WRKY  
438 factors exhibit intricate redundancy, cooperation, and antagonism on gene regulation and disease  
439 resistance to different pathogens<sup>53,54</sup>, the interaction of the NPR1-EDS1 complex with diverse TFs  
440 might fine-tune the dynamic gene expression regulating plant growth and immune responses.

441 The interaction between NPR1 and the TGA2 subclass of TFs has been shown to play an  
442 important role in activating plant defense gene expression<sup>22,66</sup>. It is suggested that NPR1 is recruited  
443 by TGA2 onto the *PR1* promoter upon SA induction<sup>20,66</sup>, but whether NPR1 directly recruits  
444 transcriptional (co)factors to promote defense gene expression remains unknown. Our data indicate  
445 that NPR1 directly recruits a novel transcriptional coactivator EDS1 onto the *PR1* promoter via a  
446 physical interaction to stimulate *PR1* expression (Figs. 5a,b). Therefore, these findings suggest a novel  
447 prominent regulatory role of NPR1's transactivation, which is required for mediating the assembly of  
448 multiple regulatory activators for specific transactivation.

449 Intriguingly, SA treatment activates the transactivation function of NPR1 presumably by releasing  
450 the autoinhibition of its cryptic transactivation activity<sup>22</sup>. This relief of repression model suggests that  
451 NPR1 can act as a coactivator in an SA-dependent manner. Our study implies that the dynamic  
452 interaction of NPR1 with certain SA-induced regulators (e.g., EDS1) (Supplementary Fig. 1b-e) may  
453 contribute to the relief of the repression of NPR1's transactivation activity by inducing conformation  
454 changes. Further structural and biochemical analyses of NPR1 and its partners are needed to test this  
455 possibility.

456 In mammalian systems, several studies have shown that diverse endogenous transcriptional  
457 activators form transcriptional condensates with the Mediator complex to robustly drive gene

458 expression<sup>78,79</sup>. Our study shows that two interacting transcriptional coactivators form nuclear foci in  
459 plant cell nuclei and interact with a component of the Mediator, CDK8 (Figs. 1e and 4d,e). Thus,  
460 these plant coactivators may form phase-separated nuclear condensates for active transcription. Most  
461 recently, NPR1 has been reported to facilitate the formation of cytoplasmic condensates for  
462 degradation of substrates to inhibit cell death<sup>80</sup>. Nonetheless, nuclear NPR1 and EDS1 may  
463 incorporate diverse transcriptional (co)factors into transcriptional activator concentrates for robust  
464 transcriptional reprogramming to relocate energy for defense instead of growth upon pathogen infection.

465 EDS1-mediated signaling can boost SA accumulation (upstream of SA) in innate immunity<sup>46</sup>. In  
466 this study, we further demonstrate that EDS1 also acts as an essential positive regulator of SA  
467 signaling (downstream of SA) because it significantly facilitates expression of *PR* and other defense  
468 genes in response to SA (Fig. 3a and Supplementary Fig. 3a-c). Furthermore, EDS1 and NPR1  
469 synergistically accelerate transcriptional reprogramming and promote pathogen resistance (Fig. 3b,c and  
470 Supplementary Fig. 3d). Consistently, EDS1-mediated SA signaling rather than SA accumulation is  
471 able to contribute to RRS1S/RPS4-mediated ETI, because overexpression of *EDS1* results in  
472 enhanced responsiveness to exogenous SA for protection against pathogen<sup>81</sup>. Consequently, EDS1  
473 functions both upstream and downstream of SA for SA-mediated defense, which is similar as  
474 *Arabidopsis* ELP2, an accelerator of immune responses<sup>82</sup>. Thus, some immune regulators potentiate  
475 plant defense through promoting both signaling transduction and biosynthesis of SA.

476 This study shows that EDS1 rather than its partners (i.e., PAD4 and SAG101) possesses intrinsic  
477 transactivation activity (Fig. 4b and Supplementary Fig. 4g). As PAD4 and SAG101 are required for  
478 accumulation of EDS1 (ref.<sup>76</sup>) and as no direct interaction of NPR1 with PAD4 or SAG101 is detected  
479 (Fig. 1a and Supplementary Fig. 1a), it is suggested that EDS1-PAD4 and/or EDS1-SAG101 complex  
480 may preferentially contribute to NPR1-mediated gene activation by stabilizing EDS1 protein in plant-  
481 pathogen interactions. On the other hand, nucleocytoplasmic coordination of EDS1 and its interacting  
482 factors are involved in cell compartment-specific and full immune responses<sup>27,45</sup>. NPR1, EDS1, and  
483 PAD4 are localized in the cytosol and nucleus<sup>18,19,76</sup>, while SAG101 is exclusively detected in the  
484 nucleus<sup>76</sup>. It is suggested that neither SAG101 nor PAD4 affects nucleocytoplasmic localization of  
485 EDS1<sup>76</sup>. However, nucleocytoplasmic EDS1-PAD4 is required for signal transduction in basal  
486 immunity and SAR<sup>28,76</sup>; nuclear EDS1-SAG101 may be important for nuclear EDS1 retention<sup>76</sup>. In  
487 this work, nucleocytoplasmic NPR1 does not affect the intracellular trafficking of EDS1 from  
488 cytoplasm to nucleus (Supplementary Fig. 5c). Instead, nuclear EDS1-NPR1 association is markedly  
489 enhanced in the specific nuclear compartment, and in turn contributes to chromatin binding of EDS1  
490 under induced states (Figs. 1e,f and 5a). Thus, the intricate dynamic association of EDS1 with its  
491 partners are essential for temporal and spatial coordination of diverse immune responses.

492 Multiple lines of evidence indicate that EDS1 control plant immunity during diverse  
493 pathways<sup>28,31</sup>. Our study primarily shows the functions of nuclear NPR1-EDS1 association with  
494 chromatin in SA signaling, whereas EDS1-PAD4 has been shown to work redundantly with SA at  
495 early defense signaling<sup>83-85</sup>. A reciprocal antagonism between SA and jasmonic acid (JA)-regulated  
496 transduction pathways play key roles in resistance to diverse pathogens<sup>86</sup>. NPR1 has been reported to  
497 inhibit JA signaling by suppressing JA-responsive gene expression<sup>87</sup>, while EDS1-PAD4 antagonizes  
498 MYC2-mediated JA signaling for RRS1S/RPS4-mediated immunity<sup>84</sup>. It seems that both NPR1 and  
499 EDS1 play a role in the crosstalk between SA and JA-mediated pathways. More studies are needed to  
500 further dissect the mechanisms of SA and JA crosstalk regulated by the interplay of NPR1 and EDS1.

501 In summary, this work sheds light on the function of a novel transcriptional coactivator complex  
502 at the epicenter of plant immunity. Our study has revealed uncharacterized roles of NPR1 and EDS1  
503 in signal transduction and activation of immune responses. Identification of EDS1 as a novel  
504 transcriptional coactivator not only opens a new avenue for studying the signaling pathways in plant  
505 immune responses, but also sheds light on the molecular basis for general gene regulation.  
506 Meanwhile, direct recruitment of coactivator by NPR1 upon immune induction provides new insight  
507 into the mechanism of NPR1's transactivation.

508

## 509 **Methods**

510 **Plant materials and growth conditions.** *Arabidopsis thaliana* (L.) Heynh. seeds were sown on  
511 autoclaved soil and vernalized at 4°C for 3 days. Plants were germinated and grown in a growth  
512 chamber at 22°C day/20°C night with ~70% relative humidity and 12-h light/12-h dark photoperiod  
513 for middle-day conditions. To grow *Arabidopsis* seedlings *in vitro*, seeds were first sterilized by  
514 chlorine gas for 3 h in a desiccator and sown on sterilized half-strength MS media (pH 5.7)  
515 supplemented with 1% sucrose and 0.25% phytigel with appropriate antibiotics. Plated seeds were  
516 stratified at 4°C for 3 days and then germinated in a growth chamber at 22°C day/20°C night under 16-  
517 h light/8-h dark photoperiod for long-day conditions. *N. benthamiana* was grown in a growth chamber  
518 at 25°C under middle-day conditions.

519 The *npr1-2* (ref.<sup>13</sup>), *npr1-3* (ref.<sup>40</sup>), *eds1-2* (ref.<sup>31</sup>), *pad4-1* (ref.<sup>40</sup>), *rps4-2* (ref.<sup>88</sup>) and *npr3-2 npr4-*  
520 *2* (ref.<sup>17</sup>) mutants are in the Columbia (Col-0) ecotype. The *eds1-1* (ref.<sup>25</sup>) is in the Wassilewskija  
521 (Ws-0) ecotype.

522  
523 **Constructs, transgenic plants and genetic analysis.** For generating expression constructs, the  
524 Gateway Cloning Technology (Invitrogen) and In-Fusion Advantage PCR Cloning Kit (Clontech)  
525 were used. Most DNA fragments were amplified and cloned into entry vectors such as pDONR207  
526 and pENTR/D-TOPO (Invitrogen), and then transferred to the destination vectors. The binary vectors  
527 were transformed into *Agrobacterium* by electroporation and then transformed into *N. benthamiana* or  
528 *Arabidopsis* lines. The stable T<sub>2</sub> transgenic lines with single inserts were analyzed and carried to  
529 produce T<sub>3</sub> homozygous progenies. At least two independent homozygous lines expressing target  
530 protein significantly were selected for further studies in all experiments. The primers (Supplementary  
531 Table 1) and recombinant DNA constructs (Supplementary Table 2) for all experiments are listed and  
532 described previously<sup>34</sup>.

533 To create p*EDS1:EDS1-FLAG* expression clones, the genomic coding region and 2-kb upstream  
534 sequences of *EDS1* DNA was cloned into entry clone and then transferred to the pEarleyGate302-  
535 3xFLAG destination vector kindly provided by Xuehua Zhong (University of Wisconsin-Madison);  
536 the combined binary vector was introduced into *Arabidopsis eds1-2* mutant background to obtain the  
537 p*EDS1:EDS1-FLAG/eds1-2* transgenic lines. For *35S:EDS1-eGFP/eds1-2* and *35S:GFP-EDS1/eds1-2*  
538 transgenic lines, the full-length *EDS1* cDNA was cloned into entry vector and transferred into  
539 pK7FWG2 and pMDC43 destination vector; these binary plasmids were introduced into *eds1-2* plants,  
540 respectively. To generate *35S:GFP-NPR1* overexpression transgenic lines and *35S:NPR1-GFP/npr1-2*  
541 plants, full-length *NPR1* cDNA was cloned into pMDC43 destination vector and pCB302 binary  
542 vector and then the resulting vectors were introduced into Col-0 wild-type and *npr1-2* mutant  
543 backgrounds, respectively.

544 All crosses among different genotypes were performed by pollinating the emasculated flowers of  
545 maternal recipient with pollen from male donor. The *npr1-2 eds1-2* and *eds1-2 npr1-2* double mutants  
546 were generated by crossing female *npr1-2* with *eds1-2* and by crossing female *eds1-2* with *npr1-2*,  
547 respectively. To generate *35S:EDS1-eGFP/eds1-2; npr1-2* lines, *npr1-2* was crossed with *35S:EDS1-*  
548 *eGFP/eds1-2* plants. For *35S:NPR1-GFP/npr1-2; eds1-2* lines, *35S:NPR1-GFP/npr1-2* as a recipient  
549 was crossed with *eds1-2*. The double mutations in the segregating F<sub>2</sub> populations was identified by a  
550 *npr1-2* CAPS maker and by PCR using primers flanking the *eds1-2* deletion region; the homozygosity  
551 for the *EDS1-eGFP* or *NPR1-GFP* transgene was confirmed in next generation by genotyping using  
552 specific primers for eGFP or GFP. All the successive plants and controls at the same generation were  
553 selected in further study. To generate p*NPR1:Myc-NPR1* plants containing p*EDS1:EDS1-FLAG*, the  
554 p*EDS1:EDS1-FLAG/eds1-2* transgenic plants was crossed with p*NPR1:Myc-NPR1/npr1-3* plants<sup>89</sup>

555 provided from Zhonglin Mou (University of Florida). The F<sub>2</sub> plants were selected on antibiotics and  
556 genotyped using *npr1-3* CAPS marker<sup>82</sup> and specific primers for *eds1-2* and transgene.

557

558 **Y2H and yeast mono-hybrid assays.** Y2H assays were performed as described previously<sup>34</sup>. The  
559 pDEST-GBKT7 based bait vectors were transformed into the yeast strain Y187 and the yeast strain  
560 AH109 was transformed with pDEST-GADT7 based vectors. The fresh diploids by yeast mating were  
561 used to detect protein-protein interactions on selective media.

562 For yeast mono-hybrid assays, pDEST-GBKT7 based GAL4 DNA-BD fusion vectors were  
563 transformed into the yeast strain AH109 including several reporters (*HIS3*, *MEL1* and *lacZ*) under  
564 distinct GAL4 upstream activating sequences as described in Matchmaker GAL4 Two-Hybrid System  
565 3 & Libraries User Manual (Clontech). The transformants were grown on synthetic dropout (SD) agar  
566 medium lacking Trp and His (-WH) and detected on SD/-WH/ X- $\alpha$ -Gal (Biosynth). The liquid  
567 cultures of yeast cells were used to detect the *lacZ* expression in quantitative  $\beta$ -galactosidase assays  
568 with o-Nitrophenyl- $\beta$ -D-Galactopyranoside (ONPG, Amresco) performed according to the Yeast  
569 Protocols Handbook (Clontech).

570

571 **Pull-down assay.** The recombinant protein expression and in vitro pull-down assay were carried out  
572 as previously described<sup>34</sup> with minor modification. For GST-fusion protein expression, the coding  
573 sequences of GUS, EDS1 and PAD4 were cloned into entry clone and transferred into pDEST15,  
574 respectively. These GST-fusion constructs and GST (empty pGEX-4T-1 vector) were heterologously  
575 expressed in the *E. coli* Rosetta (DE3) cell line. The Trx-His<sub>6</sub>-NPR1 protein was expressed in  
576 expressed in *E. coli* OverExpress<sup>TM</sup> C41 (DE3) strain using the plasmid pET-32a. For the pull-down  
577 assay, Trx-His<sub>6</sub>-NPR1 protein in 2 ml of extracts was immobilized on 30  $\mu$ L Ni-NTA agarose at 4°C  
578 for 1 h. After washed for several times, the whole cell extract of GST-protein fusion was added to  
579 each immobilized sample for 1 h at 4°C. After washing, the bound proteins were eluted by boiling in  
580 sample buffer and subjected to immunoblotting analysis. The signals were visualized as described  
581 previously.

582

583 **Agrobacterium-mediated transient expression.** *Agrobacterium*-mediated transient expression in *N.*  
584 *benthamiana* leaves were performed as described previously<sup>34</sup>. *A. tumefaciens* strain  
585 (GV3101/PMP90) carrying the indicated constructs were used together with the p19 strain for  
586 infiltration of 2~4-week-old *N. benthamiana* leaves using a needleless syringe. For transient  
587 expression in *Arabidopsis*, approximately 10 young leaves of *eds1-2* mutant were infiltrated with *A.*  
588 *tumefaciens* strain (AGL) containing each construct according to a described method<sup>90</sup>. After  
589 agroinfiltration with the presence of 0.01% Silwet L-77, plants were immediately covered, kept in the  
590 dark for 24 h and subsequently incubated under middle-day conditions for another 2~3 days.

591

592 **BiLC and BiFC assays.** For BiLC assay, the full-length coding sequence of target gene was fused to  
593 the N or C terminus of firefly luciferase using pCAMBIA1300 nLUC or pCAMBIA1300 cLUC  
594 vector; SGT1b-nLUC and cLUC-RAR1 constructs were used a positive interaction control<sup>91</sup>. Leaves  
595 excised 2 days after transient expression were sprayed with luciferin solution (100  $\mu$ M luciferin and  
596 0.01% Triton X-100) and kept in the dark for 2 h to quench fluorescence. Luc activity was observed  
597 with a low-light cooled CCD imaging apparatus (Andor iXon). In BiFC assay, the relative entry clone  
598 was transferred into pMDC43-nVenus and pMDC43-cCFP vectors<sup>26</sup> provided by Walter Gassmann  
599 (University of Missouri). The leaf tissues from the infiltrated area were observed under a confocal  
600 microscope (Leica TCS SP8) with the VENUS/GFP filters: 488 nm excitation and 530 nm emission.

601

602 **Co-IP and immunoblotting assays.** Protein fractionations for immunoblotting and Co-IP assays in *N.*  
603 *benthamiana* and *Arabidopsis* were performed as previously described<sup>34</sup>. The homogenate was  
604 sonicated on ice and optionally treated with Benzonase Nuclease (MilliporeSigma) for 30 min on ice.  
605 The solution was filtered through Miracloth (Calbiochem). The Myc-Trap<sup>®</sup>\_MA (Chromotek) and  
606 anti-FLAG<sup>®</sup> M2 magnetic beads (Sigma-Aldrich) were used to immunoprecipitated the protein  
607 complexes. Immunoblotting was performed with anti-Myc Tag (ThermoFisher) and anti-FLAG<sup>®</sup> M2  
608 antibodies (Sigma-Aldrich).

609

610 **Pathogen growth assays.** Inoculation of plants with pathogens and pathogenicity tests were  
611 performed as described previously<sup>34</sup>. Three full-grown leaves on each 4~6-week old plant grown  
612 under middle-day conditions were inoculated with different *Pseudomonas* strains. The three leaf discs  
613 from individual plant were pooled for each sample and six such replicates were used for each  
614 genotype in pathogen growth assay.

615

616 **Real-time quantitative PCR.** Gene expression analysis by qPCR was carried out as previously  
617 described<sup>34</sup> with minor modification. Total RNA was extracted using RNAzol<sup>®</sup>RT (Sigma-Aldrich)  
618 and 2 µg of total RNA was subjected to reverse transcription using qScript cDNA Synthesis Kit  
619 (Quanta). Real-time PCR was performed using PerfeCTa SYBR Green FastMix (Quanta). The  
620 primers used for qPCR in this study are shown in Supplementary Table 1.

621

622 **Cell fractionation.** Preparation of nuclear and cytoplasmic fractions was performed according to the  
623 user manual supplied with the CellLytic<sup>™</sup> PN Plant Nuclei Isolation/Extraction Kit (Sigma) with  
624 minor modifications. Approximately 2 g of plant tissues were suspended in nuclei isolation buffer  
625 (NIB) and passed through a provided filter mesh. After centrifugation for 15 min, the supernatant was  
626 used for further extraction of cytoplasmic proteins and the pellet was used to further extract nuclei and  
627 nuclear proteins. The transferred supernatant was centrifugated for 10 min at 12,000 rpm, 4°C and the  
628 clean supernatant was collected as cytoplasmic fractions. The initial pelleted nuclei were resuspended  
629 in 10 ml NIBA (1X NIB, 1 mM DTT, 1X protease inhibitor cocktail and 0.5% Triton X-100). After  
630 centrifugation, isolation of nuclei was carried out as described with Semi-pure Preparation of Nuclei  
631 Procedures based on the manufacture protocol. The cellular fractions were analyzed on reducing SDS-  
632 PAGE and transferred to Nitrocellulose membranes. PEPC and RuBisCo were detected and used as  
633 cytoplasmic markers, and histone H3 was used as nuclear marker.

634

635 **ChIP analysis.** ChIP was performed according to a previous report<sup>92</sup> with modifications.  
636 Approximately 3 g of 4-week-old soil-grown plants or 3-week-old seedlings were harvested and  
637 vacuum infiltrated with 1% formaldehyde for cross-linking. The cross-linking reaction was  
638 subsequently stopped by 150 mM glycine. Samples were washed three times with sterile deionized  
639 water, dried on paper towel, frozen and stored at -80°C for further use. For chromatin isolation, plant  
640 tissues were ground to a fine powder in liquid nitrogen and mixed with 30 ml cold nuclei isolation  
641 buffer (0.25 M sucrose, 15 mM PIPES pH 6.8 or 10 mM Tris-HCl pH 7.5, 5 mM MgCl<sub>2</sub>, 60 mM KCl,  
642 15 mM NaCl, 1 mM CaCl<sub>2</sub>, 1% Triton X-100, 1 mM PMSF, 2 µg/ml pepstatin A, 2 µg/ml aprotinin,  
643 and 1 mM DTT). Samples were incubated on ice for 5 min with gentle vortex and then filter through  
644 two layers of Miracloth (Calbiochem) and centrifuged at 4°C, 3000 g, for 20 min. The nuclear pellets  
645 were gently resuspended in 1.5 ml of cold nuclei lysis buffer (50 mM Tris-HCl pH 7.5, 150 mM  
646 NaCl, 1 mM EDTA, 0.3% sarkosyl, 1% Triton X-100, 50 µM MG-115, 1 mM PMSF, protease

647 inhibitor cocktail, and 1 mM DTT) and incubated on ice with gentle mixing for 5 min. Chromatin was  
648 sheared into approximate 500 bp DNA fragments using M220 Focused-ultrasonicator (Covaris) and  
649 centrifuged at 13,000 g, 4°C for 15 min. The supernatant was collected for further steps.

650 For the immunoprecipitation step, the samples were diluted with ChIP dilution buffer (20 mM  
651 Tris-HCl pH 7.5, 150 mM NaCl, 1 mM EDTA, 1% Triton X-100, 50 µM MG-115, 1 mM PMSF,  
652 protease inhibitor cocktail, and 1 mM DTT) and precleared for 1 h using control magnetic agarose  
653 beads blocked with 100 µg/µl BSA. After removing the beads, 5% of precleared chromatin was  
654 retained as input control. Meanwhile, the remaining samples were mixed with conjugated anti-Myc  
655 tag antibody (Abcam) with Magna ChIP™ Protein A Magnetic Beads (Sigma-Aldrich) for Myc-  
656 NPR1, anti-FLAG® M2 magnetic beads (Sigma-Aldrich) for FLAG-EDS1, or GFP-Trap®\_MA beads  
657 (Chromotek) for EDS1-eGFP. The mixture was incubated at 4°C for 4 h with gentle rotation and then  
658 the immunocomplexes were washed twice each with low salt, high salt, LiCl, and TE buffer.

659 In the reverse cross-linking steps, ChIP sample and input control were mixed with 20% Chelex®  
660 100 Resin (Sigma-Aldrich) solution at room temperature and incubated for 10 min at 95°C shaking  
661 every 3 min. Once the sample was cooled down, 20 µg of proteinase K (Invitrogen) was added to a  
662 final volume of 200 µl of ChIP reaction in TE, and incubated at 50°C for 1 h followed by boiling for  
663 10 min. After spin down, the supernatant was transferred and retained, the pelleted beads were washed  
664 with TE; the washing flow-through was added to the initial supernatant. Then 5 µg of RNase A  
665 (Thermo Scientific) was added into each sample and incubated at 37°C for 30 min.  
666 Immunoprecipitated DNA was purified using a mixture of phenol:chloroform:isoamyl alcohol  
667 (25:24:1) followed by chloroform extraction, ethanol precipitated using Dr. GenTLE Precipitation  
668 Carrier (TaKaRa) with incubation at -80°C for 1 h, recovered by centrifugation, washed and  
669 resuspended in 100 µl of TE.

670 Recovered DNA was quantified by qPCR described as above, with the locus-specific primers  
671 (Supplementary Table 1) and ChIP-qPCR was performed with at least three technical replicates.  
672 Relative DNA level for each amplicon was calculated against the total input using the  $\Delta\Delta C_{Tf}$  method.  
673 Relative fold enrichment was standardized to the *Actin2* open reading frame.

674  
675 **Quantification and statistical analyses.** The results of Western Blots were quantified with software  
676 ImageJ (NIH). Statistical analysis was conducted with the software of GraphPad Prism 6.0 using one-  
677 way or two-way analysis of variance (ANOVA) with Tukey's multiple comparisons test or using  
678 multiple Student's *t* tests. Error bars represent standard deviations (SD) or standard errors (SE).  
679 Statistically significant differences are marked with asterisks (*t*-test, \*  $P < 0.05$ ; \*\*,  $P < 0.01$ ; \*\*\*,  $P <$   
680  $0.001$ ) or different letters ( $P < 0.05$ ). For instance, different letter (A, B, C, etc) are used to label  
681 samples with statistical differences, whereas the "ABC" is used to mark samples with no statistical  
682 difference to other samples labeled with "A", "B" or "C". Detail statistical differences can be found in  
683 the figures and figure legends.

684  
685 **Reporting Summary.** Further information on research design is available in the Nature Research  
686 Reporting Summary linked to this article.

687  
688 **Data availability.** All supporting data are available in the main text, Supplementary Figs. 1-6 and  
689 Supplementary Tables 1-2 in the Supplementary Information. Source data are provided with this  
690 paper. Any additional data that support the findings of this study are available from the corresponding  
691 authors upon reasonable request. The databases that we used are all publicly available.

692

## 693 **References**

- 694
- 695 1. Dodds, P.N. & Rathjen, J.P. Plant immunity: towards an integrated view of plant-pathogen interactions. *Nat Rev*
- 696 *Genet* **11**, 539-548 (2010).
- 697 2. Dangl, J.L., Horvath, D.M. & Staskawicz, B.J. Pivoting the plant immune system from dissection to deployment.
- 698 *Science* **341**, 746-751 (2013).
- 699 3. Wan, L. *et al.* TIR domains of plant immune receptors are NAD(+)-cleaving enzymes that promote cell death.
- 700 *Science* **365**, 799-803 (2019).
- 701 4. Burdett, H. *et al.* The Plant "Resistosome": Structural Insights into Immune Signaling. *Cell Host Microbe* **26**,
- 702 193-201 (2019).
- 703 5. Hartmann, M. & Zeier, J. N-hydroxypipicolinic acid and salicylic acid: a metabolic duo for systemic acquired
- 704 resistance. *Curr Opin Plant Biol* **50**, 44-57 (2019).
- 705 6. Fu, Z.Q. & Dong, X. Systemic acquired resistance: turning local infection into global defense. *Annu Rev Plant*
- 706 *Biol* **64**, 839-863 (2013).
- 707 7. Pieterse, C.M., Van der Does, D., Zamioudis, C., Leon-Reyes, A. & Van Wees, S.C. Hormonal modulation of
- 708 plant immunity. *Annu Rev Cell Dev Biol* **28**, 489-521 (2012).
- 709 8. An, C.F. & Mou, Z.L. Salicylic Acid and its Function in Plant Immunity. *Journal of Integrative Plant Biology* **53**,
- 710 412-428 (2011).
- 711 9. Mishina, T.E. & Zeier, J. Pathogen-associated molecular pattern recognition rather than development of tissue
- 712 necrosis contributes to bacterial induction of systemic acquired resistance in Arabidopsis. *Plant J* **50**, 500-513
- 713 (2007).
- 714 10. Wildermuth, M.C., Dewdney, J., Wu, G. & Ausubel, F.M. Isochorismate synthase is required to synthesize
- 715 salicylic acid for plant defence. *Nature* **414**, 562-565 (2001).
- 716 11. Ryals, J.A. *et al.* Systemic acquired resistance. *Plant Cell* **8**, 1809-1819 (1996).
- 717 12. Durner, J., Shah, J. & Klessig, D.F. Salicylic acid and disease resistance in plants. *Trends in Plant Science* **2**, 266-
- 718 274 (1997).
- 719 13. Cao, H., Glazebrook, J., Clarke, J.D., Volko, S. & Dong, X. The Arabidopsis NPR1 gene that controls systemic
- 720 acquired resistance encodes a novel protein containing ankyrin repeats. *Cell* **88**, 57-63 (1997).
- 721 14. Wu, Y. *et al.* The Arabidopsis NPR1 protein is a receptor for the plant defense hormone salicylic acid. *Cell Rep* **1**,
- 722 639-647 (2012).
- 723 15. Manohar, M. *et al.* Identification of multiple salicylic acid-binding proteins using two high throughput screens.
- 724 *Front Plant Sci* **5**, 777 (2014).
- 725 16. Ding, Y. *et al.* Opposite Roles of Salicylic Acid Receptors NPR1 and NPR3/NPR4 in Transcriptional Regulation
- 726 of Plant Immunity. *Cell* **173**, 1454-1467 e1415 (2018).
- 727 17. Fu, Z.Q. *et al.* NPR3 and NPR4 are receptors for the immune signal salicylic acid in plants. *Nature* **486**, 228-232
- 728 (2012).
- 729 18. Mou, Z., Fan, W. & Dong, X. Inducers of plant systemic acquired resistance regulate NPR1 function through
- 730 redox changes. *Cell* **113**, 935-944 (2003).
- 731 19. Kinkema, M., Fan, W. & Dong, X. Nuclear localization of NPR1 is required for activation of PR gene expression.
- 732 *Plant Cell* **12**, 2339-2350 (2000).
- 733 20. Fan, W. & Dong, X. In vivo interaction between NPR1 and transcription factor TGA2 leads to salicylic acid-
- 734 mediated gene activation in Arabidopsis. *Plant Cell* **14**, 1377-1389 (2002).
- 735 21. Li, M. *et al.* TCP Transcription Factors Interact With NPR1 and Contribute Redundantly to Systemic Acquired
- 736 Resistance. *Front Plant Sci* **9**, 1153 (2018).



- 737 22. Rochon, A., Boyle, P., Wignes, T., Fobert, P.R. & Despres, C. The coactivator function of Arabidopsis NPR1  
738 requires the core of its BTB/POZ domain and the oxidation of C-terminal cysteines. *Plant Cell* **18**, 3670-3685  
739 (2006).
- 740 23. Wang, D., Amornsiripanitch, N. & Dong, X. A genomic approach to identify regulatory nodes in the  
741 transcriptional network of systemic acquired resistance in plants. *PLoS Pathog* **2**, e123 (2006).
- 742 24. Aarts, N. *et al.* Different requirements for EDS1 and NDR1 by disease resistance genes define at least two R  
743 gene-mediated signaling pathways in Arabidopsis. *Proc Natl Acad Sci U S A* **95**, 10306-10311 (1998).
- 744 25. Falk, A. *et al.* EDS1, an essential component of R gene-mediated disease resistance in Arabidopsis has homology  
745 to eukaryotic lipases. *Proc Natl Acad Sci U S A* **96**, 3292-3297 (1999).
- 746 26. Bhattacharjee, S., Halane, M.K., Kim, S.H. & Gassmann, W. Pathogen effectors target Arabidopsis EDS1 and  
747 alter its interactions with immune regulators. *Science* **334**, 1405-1408 (2011).
- 748 27. Heidrich, K. *et al.* Arabidopsis EDS1 connects pathogen effector recognition to cell compartment-specific  
749 immune responses. *Science* **334**, 1401-1404 (2011).
- 750 28. Rietz, S. *et al.* Different roles of Enhanced Disease Susceptibility1 (EDS1) bound to and dissociated from  
751 Phytoalexin Deficient4 (PAD4) in Arabidopsis immunity. *New Phytol* **191**, 107-119 (2011).
- 752 29. Wagner, S. *et al.* Structural basis for signaling by exclusive EDS1 heteromeric complexes with SAG101 or PAD4  
753 in plant innate immunity. *Cell Host Microbe* **14**, 619-630 (2013).
- 754 30. Lapin, D. *et al.* A Coevolved EDS1-SAG101-NRG1 Module Mediates Cell Death Signaling by TIR-Domain  
755 Immune Receptors. *Plant Cell* **31**, 2430-2455 (2019).
- 756 31. Bartsch, M. *et al.* Salicylic acid-independent ENHANCED DISEASE SUSCEPTIBILITY1 signaling in  
757 Arabidopsis immunity and cell death is regulated by the monooxygenase FMO1 and the Nudix hydrolase  
758 NUDT7. *Plant Cell* **18**, 1038-1051 (2006).
- 759 32. Lapin, D., Bhandari, D.D. & Parker, J.E. Origins and Immunity Networking Functions of EDS1 Family Proteins.  
760 *Annu Rev Phytopathol* (2020).
- 761 33. Pajerowska-Mukhtar, K.M., Emerine, D.K. & Mukhtar, M.S. Tell me more: roles of NPRs in plant immunity.  
762 *Trends Plant Sci* **18**, 402-411 (2013).
- 763 34. Chen, H. *et al.* A Bacterial Type III Effector Targets the Master Regulator of Salicylic Acid Signaling, NPR1, to  
764 Subvert Plant Immunity. *Cell Host Microbe* **22**, 777-788 e777 (2017).
- 765 35. Sawyer, I.A. & Dundr, M. Nuclear bodies: Built to boost. *J Cell Biol* **213**, 509-511 (2016).
- 766 36. Mosavi, L.K., Cammett, T.J., Desrosiers, D.C. & Peng, Z.Y. The ankyrin repeat as molecular architecture for  
767 protein recognition. *Protein Science* **13**, 1435-1448 (2004).
- 768 37. Aravind, L. & Koonin, E.V. Fold prediction and evolutionary analysis of the POZ domain: Structural and  
769 evolutionary relationship with the potassium channel tetramerization domain. *Journal of Molecular Biology* **285**,  
770 1353-1361 (1999).
- 771 38. Cao, H., Bowling, S.A., Gordon, A.S. & Dong, X. Characterization of an Arabidopsis Mutant That Is  
772 Nonresponsive to Inducers of Systemic Acquired Resistance. *Plant Cell* **6**, 1583-1592 (1994).
- 773 39. Delaney, T.P., Friedrich, L. & Ryals, J.A. Arabidopsis signal transduction mutant defective in chemically and  
774 biologically induced disease resistance. *Proc Natl Acad Sci U S A* **92**, 6602-6606 (1995).
- 775 40. Glazebrook, J., Rogers, E.E. & Ausubel, F.M. Isolation of Arabidopsis mutants with enhanced disease  
776 susceptibility by direct screening. *Genetics* **143**, 973-982 (1996).
- 777 41. Shah, J., Tsui, F. & Klessig, D.F. Characterization of a salicylic acid-insensitive mutant (sai1) of Arabidopsis  
778 thaliana, identified in a selective screen utilizing the SA-inducible expression of the tms2 gene. *Molecular Plant-  
779 Microbe Interactions* **10**, 69-78 (1997).
- 780 42. Wang, W. *et al.* Structural basis of salicylic acid perception by Arabidopsis NPR proteins. *Nature* (2020).
- 781 43. Nishimura, M.T., Monteiro, F. & Dangl, J.L. Treasure your exceptions: unusual domains in immune receptors  
782 reveal host virulence targets. *Cell* **161**, 957-960 (2015).

- 783 44. Bent, A.F. *et al.* RPS2 of *Arabidopsis thaliana*: a leucine-rich repeat class of plant disease resistance genes.  
784 *Science* **265**, 1856-1860 (1994).
- 785 45. Garcia, A.V. *et al.* Balanced nuclear and cytoplasmic activities of EDS1 are required for a complete plant innate  
786 immune response. *PLoS Pathog* **6**, e1000970 (2010).
- 787 46. Feys, B.J., Moisan, L.J., Newman, M.A. & Parker, J.E. Direct interaction between the *Arabidopsis* disease  
788 resistance signaling proteins, EDS1 and PAD4. *Embo Journal* **20**, 5400-5411 (2001).
- 789 47. van Loon, L.C., Rep, M. & Pieterse, C.M. Significance of inducible defense-related proteins in infected plants.  
790 *Annu Rev Phytopathol* **44**, 135-162 (2006).
- 791 48. Uknes, S. *et al.* Acquired resistance in *Arabidopsis*. *Plant Cell* **4**, 645-656 (1992).
- 792 49. Zhou, J.M. *et al.* NPR1 differentially interacts with members of the TGA/OBF family of transcription factors that  
793 bind an element of the PR-1 gene required for induction by salicylic acid. *Mol Plant Microbe Interact* **13**, 191-  
794 202 (2000).
- 795 50. Shearer, H.L. *et al.* *Arabidopsis* clade I TGA transcription factors regulate plant defenses in an NPR1-  
796 independent fashion. *Mol Plant Microbe Interact* **25**, 1459-1468 (2012).
- 797 51. Zhang, Y., Tessaro, M.J., Lassner, M. & Li, X. Knockout analysis of *Arabidopsis* transcription factors TGA2,  
798 TGA5, and TGA6 reveals their redundant and essential roles in systemic acquired resistance. *Plant Cell* **15**, 2647-  
799 2653 (2003).
- 800 52. Zhou, M. *et al.* WRKY70 prevents axenic activation of plant immunity by direct repression of SARD1. *New*  
801 *Phytol* **217**, 700-712 (2018).
- 802 53. Xu, X.P., Chen, C.H., Fan, B.F. & Chen, Z.X. Physical and functional interactions between pathogen-induced  
803 *Arabidopsis* WRKY18, WRKY40, and WRKY60 transcription factors. *Plant Cell* **18**, 1310-1326 (2006).
- 804 54. Eulgem, T. & Somssich, I.E. Networks of WRKY transcription factors in defense signaling. *Curr Opin Plant Biol*  
805 **10**, 366-371 (2007).
- 806 55. Spoel, S.H. *et al.* Proteasome-mediated turnover of the transcription coactivator NPR1 plays dual roles in  
807 regulating plant immunity. *Cell* **137**, 860-872 (2009).
- 808 56. Bharti, K. *et al.* Isolation and characterization of HsfA3, a new heat stress transcription factor of *Lycopersicon*  
809 *peruvianum*. *Plant J* **22**, 355-365 (2000).
- 810 57. Chen, H. *et al.* *Arabidopsis* DREB2C functions as a transcriptional activator of HsfA3 during the heat stress  
811 response. *Biochem Biophys Res Commun* **401**, 238-244 (2010).
- 812 58. Ma, J. & Ptashne, M. A new class of yeast transcriptional activators. *Cell* **51**, 113-119 (1987).
- 813 59. Hope, I.A., Mahadevan, S. & Struhl, K. Structural and functional characterization of the short acidic  
814 transcriptional activation region of yeast GCN4 protein. *Nature* **333**, 635-640 (1988).
- 815 60. Pennica, D. *et al.* The amino acid sequence of murine p53 determined from a c-DNA clone. *Virology* **134**, 477-  
816 482 (1984).
- 817 61. Cress, W.D. & Triezenberg, S.J. Critical structural elements of the VP16 transcriptional activation domain.  
818 *Science* **251**, 87-90 (1991).
- 819 62. Conaway, R.C. & Conaway, J.W. Function and regulation of the Mediator complex. *Curr Opin Genet Dev* **21**,  
820 225-230 (2011).
- 821 63. Galbraith, M.D., Donner, A.J. & Espinosa, J.M. CDK8: a positive regulator of transcription. *Transcription* **1**, 4-  
822 12 (2010).
- 823 64. Zhu, Y. *et al.* CYCLIN-DEPENDENT KINASE8 differentially regulates plant immunity to fungal pathogens  
824 through kinase-dependent and -independent functions in *Arabidopsis*. *Plant Cell* **26**, 4149-4170 (2014).
- 825 65. Chen, J. *et al.* NPR1 Promotes Its Own and Target Gene Expression in Plant Defense by Recruiting CDK8. *Plant*  
826 *Physiol* **181**, 289-304 (2019).
- 827 66. Jin, H. *et al.* Salicylic acid-induced transcriptional reprogramming by the HAC-NPR1-TGA histone  
828 acetyltransferase complex in *Arabidopsis*. *Nucleic Acids Res* **46**, 11712-11725 (2018).

- 829 67. Lebel, E. *et al.* Functional analysis of regulatory sequences controlling PR-1 gene expression in Arabidopsis.  
830 *Plant J* **16**, 223-233 (1998).
- 831 68. Kesarwani, M., Yoo, J.M. & Dong, X.N. Genetic interactions of TGA transcription factors in the regulation of  
832 pathogenesis-related genes and disease resistance in Arabidopsis. *Plant Physiology* **144**, 336-346 (2007).
- 833 69. Liu, L. *et al.* Salicylic acid receptors activate jasmonic acid signalling through a non-canonical pathway to  
834 promote effector-triggered immunity. *Nat Commun* **7**, 13099 (2016).
- 835 70. Chang, M. *et al.* PBS3 Protects EDS1 from Proteasome-Mediated Degradation in Plant Immunity. *Mol Plant* **12**,  
836 678-688 (2019).
- 837 71. Century, K.S., Holub, E.B. & Staskawicz, B.J. NDR1, a locus of Arabidopsis thaliana that is required for disease  
838 resistance to both a bacterial and a fungal pathogen. *Proc Natl Acad Sci U S A* **92**, 6597-6601 (1995).
- 839 72. Warren, R.F., Merritt, P.M., Holub, E. & Innes, R.W. Identification of three putative signal transduction genes  
840 involved in R gene-specified disease resistance in Arabidopsis. *Genetics* **152**, 401-412 (1999).
- 841 73. Nawrath, C., Heck, S., Parinthewong, N. & Metraux, J.P. EDS5, an essential component of salicylic acid-  
842 dependent signaling for disease resistance in Arabidopsis, is a member of the MATE transporter family. *Plant*  
843 *Cell* **14**, 275-286 (2002).
- 844 74. Zheng, Z., Qualley, A., Fan, B., Dudareva, N. & Chen, Z. An important role of a BAHD acyl transferase-like  
845 protein in plant innate immunity. *Plant J* **57**, 1040-1053 (2009).
- 846 75. Ryals, J. *et al.* The Arabidopsis NIM1 protein shows homology to the mammalian transcription factor inhibitor I  
847 kappa B. *Plant Cell* **9**, 425-439 (1997).
- 848 76. Feys, B.J. *et al.* Arabidopsis SENESCENCE-ASSOCIATED GENE101 stabilizes and signals within an  
849 ENHANCED DISEASE SUSCEPTIBILITY1 complex in plant innate immunity. *Plant Cell* **17**, 2601-2613  
850 (2005).
- 851 77. Saleh, A. *et al.* Posttranslational Modifications of the Master Transcriptional Regulator NPR1 Enable Dynamic  
852 but Tight Control of Plant Immune Responses. *Cell Host Microbe* **18**, 169-182 (2015).
- 853 78. Cho, W.K. *et al.* Mediator and RNA polymerase II clusters associate in transcription-dependent condensates.  
854 *Science* **361**, 412-415 (2018).
- 855 79. Plys, A.J. & Kingston, R.E. Dynamic condensates activate transcription. *Science* **361**, 329-330 (2018).
- 856 80. Zavaliev, R., Mohan, R., Chen, T. & Dong, X. Formation of NPR1 Condensates Promotes Cell Survival during  
857 the Plant Immune Response. *Cell* **182**, 1093-1108 e1018 (2020).
- 858 81. Venugopal, S.C. *et al.* Enhanced disease susceptibility 1 and salicylic acid act redundantly to regulate resistance  
859 gene-mediated signaling. *PLoS Genet* **5**, e1000545 (2009).
- 860 82. DeFraia, C.T., Zhang, X.D. & Mou, Z.L. Elongator subunit 2 is an accelerator of immune responses in  
861 Arabidopsis thaliana. *Plant Journal* **64**, 511-523 (2010).
- 862 83. Cui, H. *et al.* A core function of EDS1 with PAD4 is to protect the salicylic acid defense sector in Arabidopsis  
863 immunity. *New Phytol* **213**, 1802-1817 (2017).
- 864 84. Cui, H. *et al.* Antagonism of Transcription Factor MYC2 by EDS1/PAD4 Complexes Bolsters Salicylic Acid  
865 Defense in Arabidopsis Effector-Triggered Immunity. *Mol Plant* **11**, 1053-1066 (2018).
- 866 85. Rusterucci, C., Aviv, D.H., Holt, B.F., 3rd, Dangl, J.L. & Parker, J.E. The disease resistance signaling  
867 components EDS1 and PAD4 are essential regulators of the cell death pathway controlled by LSD1 in  
868 Arabidopsis. *Plant Cell* **13**, 2211-2224 (2001).
- 869 86. Thaler, J.S., Humphrey, P.T. & Whiteman, N.K. Evolution of jasmonate and salicylate signal crosstalk. *Trends*  
870 *Plant Sci* **17**, 260-270 (2012).
- 871 87. Spoel, S.H. *et al.* NPR1 modulates cross-talk between salicylate- and jasmonate-dependent defense pathways  
872 through a novel function in the cytosol. *Plant Cell* **15**, 760-770 (2003).
- 873 88. Wirthmueller, L., Zhang, Y., Jones, J.D. & Parker, J.E. Nuclear accumulation of the Arabidopsis immune  
874 receptor RPS4 is necessary for triggering EDS1-dependent defense. *Curr Biol* **17**, 2023-2029 (2007).

- 875 89. Zhang, X., Wang, C., Zhang, Y., Sun, Y. & Mou, Z. The Arabidopsis mediator complex subunit16 positively  
876 regulates salicylate-mediated systemic acquired resistance and jasmonate/ethylene-induced defense pathways.  
877 *Plant Cell* **24**, 4294-4309 (2012).
- 878 90. Zhang, Y. *et al.* A Highly Efficient Agrobacterium-Mediated Method for Transient Gene Expression and  
879 Functional Studies in Multiple Plant Species. *Plant Commun* **1**, 100028 (2020).
- 880 91. Chen, H. *et al.* Firefly luciferase complementation imaging assay for protein-protein interactions in plants. *Plant*  
881 *Physiol* **146**, 368-376 (2008).
- 882 92. Saleh, A., Alvarez-Venegas, R. & Avramova, Z. An efficient chromatin immunoprecipitation (ChIP) protocol for  
883 studying histone modifications in Arabidopsis plants. *Nat Protoc* **3**, 1018-1025 (2008).
- 884

## 885 **Acknowledgments**

886 We are grateful to Xinnian Dong for *35S:NPRI(nls)-GFP* transgenic line, Zhonglin Mou for  
887 *pNPRI:Myc-NPRI* transgenic line, Walter Gassmann for BiFC constructs and Xuehua Zhong for  
888 *pEarleyGate302-3xFLAG* plasmid. We thank Beth Krizek and David Reisman for critical reading of  
889 this manuscript.

890

## 891 **Author contributions**

892 H.C., F.L., and Z.Q.F conceived and designed the experiments. H.C. performed most experiments  
893 with assistance with M.L., G.Q., M.Z., L.L., and J.Z.. All authors participated in results discussion and  
894 data analysis. H.C., F.L., and Z.Q.F wrote the manuscript with contribution from D.W.

895

## 896 **Competing interests**

897 The authors declare no competing interests.

898

## 899 **Additional information**

900 **Supplementary information** is available for this paper.

901 **Correspondence and requests for materials** should be addressed to F.L. or Z.Q.F.

902

## 903 **Figures and legends**

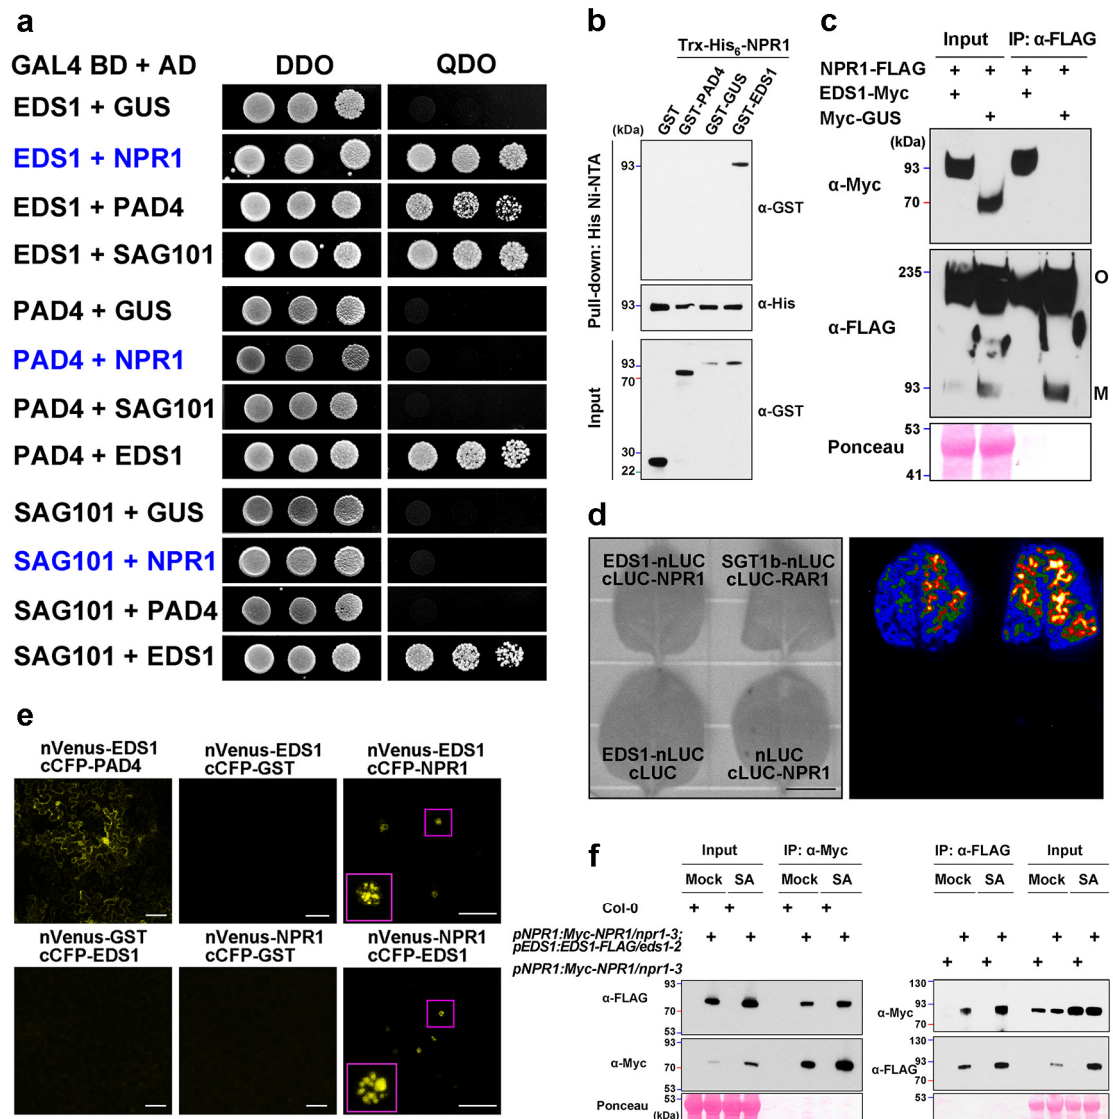

**Fig.1**

904

905 **Fig.1 | NPR1 directly interacts with EDS1.** **a**, NPR1 interacts with EDS1 in Y2H assays. The growth of yeast  
906 strains on nonselective double dropout medium (DDO) and selective quadruple dropout medium (QDO) is  
907 shown. GAL4 BD, GAL4 DNA-binding domain; AD, activation domain. **b**, NPR1 interacts with EDS1 in the  
908 *in vitro* pull-down assays. Trx-His<sub>6</sub>-NPR1 was used to pull down GST and GST fusion proteins. Trx-His<sub>6</sub>-  
909 NPR1 and GST fusion proteins were detected by western blotting with anti-His and anti-GST antibodies,  
910 respectively. **c**, NPR1 interacts with EDS1 in *N. benthamiana*. The *NPR1-3FLAG* under the control of its native  
911 promoter was transiently expressed with *EDS1-Myc* under the control of its native promoter or *Myc-GUS* under  
912 the control of the 35S promoter in *N. benthamiana*. Co-IP assay was performed using anti-FLAG magnetic  
913 beads. O, oligomeric NPR1; M, monomeric NPR1. **d**, NPR1 interacts with EDS1 in BiLC assays. The indicated  
914 vectors were coexpressed in *N. benthamiana* leaves and luciferase complementation imaging assays were  
915 performed. Scale bar, 1 cm. **e**, NPR1 interacts with EDS1 in nuclei in BiFC assays. *N. benthamiana* was co-  
916 transformed with indicated constructs. Magnified nuclear body is shown in red box. Scale bars, 150 μm. **f**,  
917 NPR1 interacts with EDS1 in *Arabidopsis*. The two-week-old *Arabidopsis* seedlings were treated with 0.5 mM  
918 SA or water (Mock) for 9 h, and total protein extract was subject to Co-IP assays using Myc-Trap\_MA or anti-  
919 FLAG magnetic beads. Ponceau S staining of RuBisCo is used for confirmation of equal loading. Protein sizes  
920 marked on the left are in kDa.

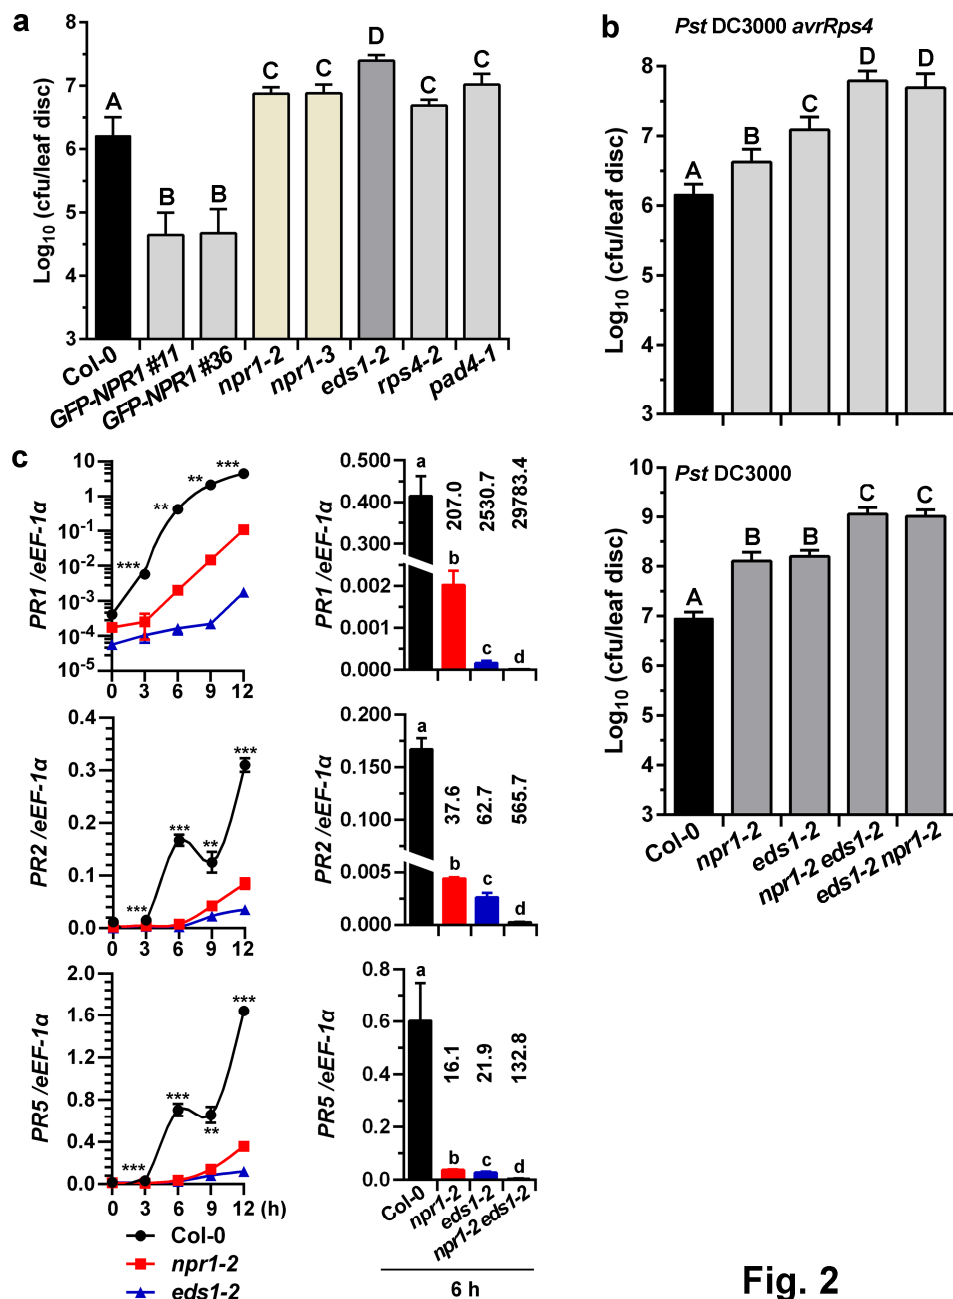

**Fig. 2**

921

922

923

924

925

926

927

928

929

930

931

932

933

934

935

**Fig. 2 | Genetic and molecular interactions of NPR1 with EDS1.** **a**, NPR1 contributes to ETI. Growth of *Pst* DC3000 *avrRps4* on Col-0, different mutants and transgenic *Arabidopsis* overexpressing *GFP-NPR1* under the control of the *CaMV* 35S promoter. **b**, NPR1 and EDS1 additively activate immune responses. Leaves from soil-grown *Arabidopsis* (**a,b**) were hand-infiltrated with indicated bacterial suspensions ( $OD_{600} = 0.0005$ ) and bacterial titers were measured at 2 d post-inoculation (dpi). CFU, colony-forming units. **c**, NPR1 and EDS1 synergistically upregulates *PR* genes. Leaves from 4-week-old plants inoculated with *Pst* DC3000 *avrRps4* ( $OD_{600} = 0.01$ ) were collected at indicated time points and *PR* gene expression was checked using real-time qPCR. Expression of *PR1* was plotted on a  $\log_{10}$  scale; gene expression levels were normalized against the constitutively expressed *eEF-1α*. Right panel, the expression of *PR* genes at 6 h after pathogen infection. Notably, the numbers above the error bars indicate the fold change of gene expression compared with Col-0. Error bars represent standard deviation (SD).  $n = 6$  biologically independent samples (**a,b**);  $n = 4$  biologically independent samples (**c**). Statistically significant differences are indicated by different lowercase letters (ANOVA,  $P < 0.05$ ) or shown between Col-0 and single mutant (*npr1-2* or *eds1-2*) plants (*t*-test, \*\*,  $P < 0.01$ ; \*\*\*,  $P < 0.001$ ).

936

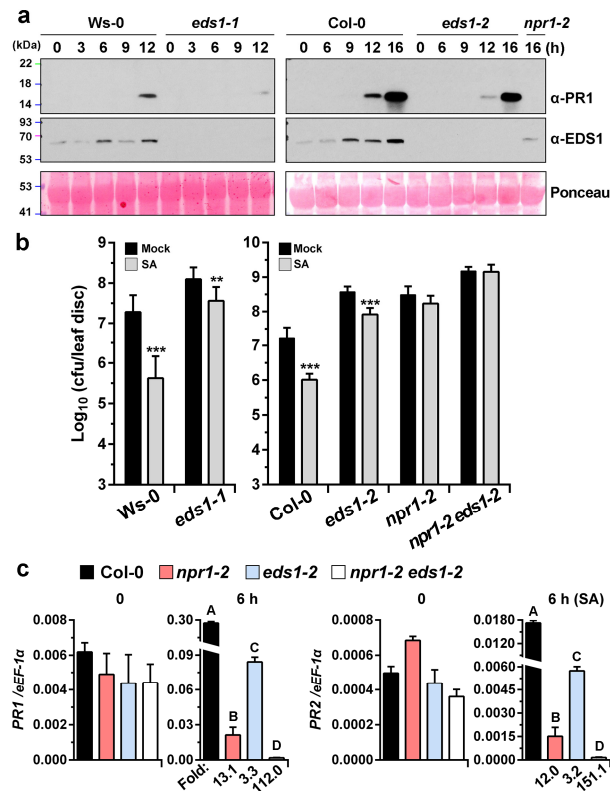

**Fig. 3**

937

938

939 **Fig. 3 | NPR1 and EDS1 function downstream of SA.** **a**, EDS1 is a positive regulator of SA  
 940 signaling. Total protein was prepared from leaf tissues of 4-week-old plants infiltrated with 0.3 mM  
 941 SA and subjected to immunoblotting with indicated antibodies. This experiment is representative of at  
 942 least two independent replicates. **b**, EDS1 contributes to SA-induced pathogen resistance. Plants were  
 943 treated with soil drenches plus foliar sprays of 0.5 mM SA or water (Mock). After 24 h, leaves were  
 944 inoculated with *Pst* DC3000 (OD<sub>600</sub> = 0.0005) and the *in planta* bacterial titers were determined at 3  
 945 dpi. Error bars represent standard error (SE); n = 3 biologically independent experiments. Statistical  
 946 differences from Mock in each genotype are shown (*t*-test, \*\*, *P* < 0.01; \*\*\*, *P* < 0.001). **c**, NPR1 and  
 947 EDS1 synergistically upregulate *PR1* and *PR2*. Two-week-old seedlings grown on 1/2 MS media  
 948 were exogenously treated with hydroponic 0.5 mM SA solution for 6 h. Total RNA was extracted and  
 949 subjected to qRT-PCR. Error bars indicate SD; n = 4 biologically independent samples. Different  
 950 letters indicate statistical differences (*P* < 0.01). Folds on the x-axis indicate fold reduction of gene  
 951 expression compared with the value obtained in Col-0.

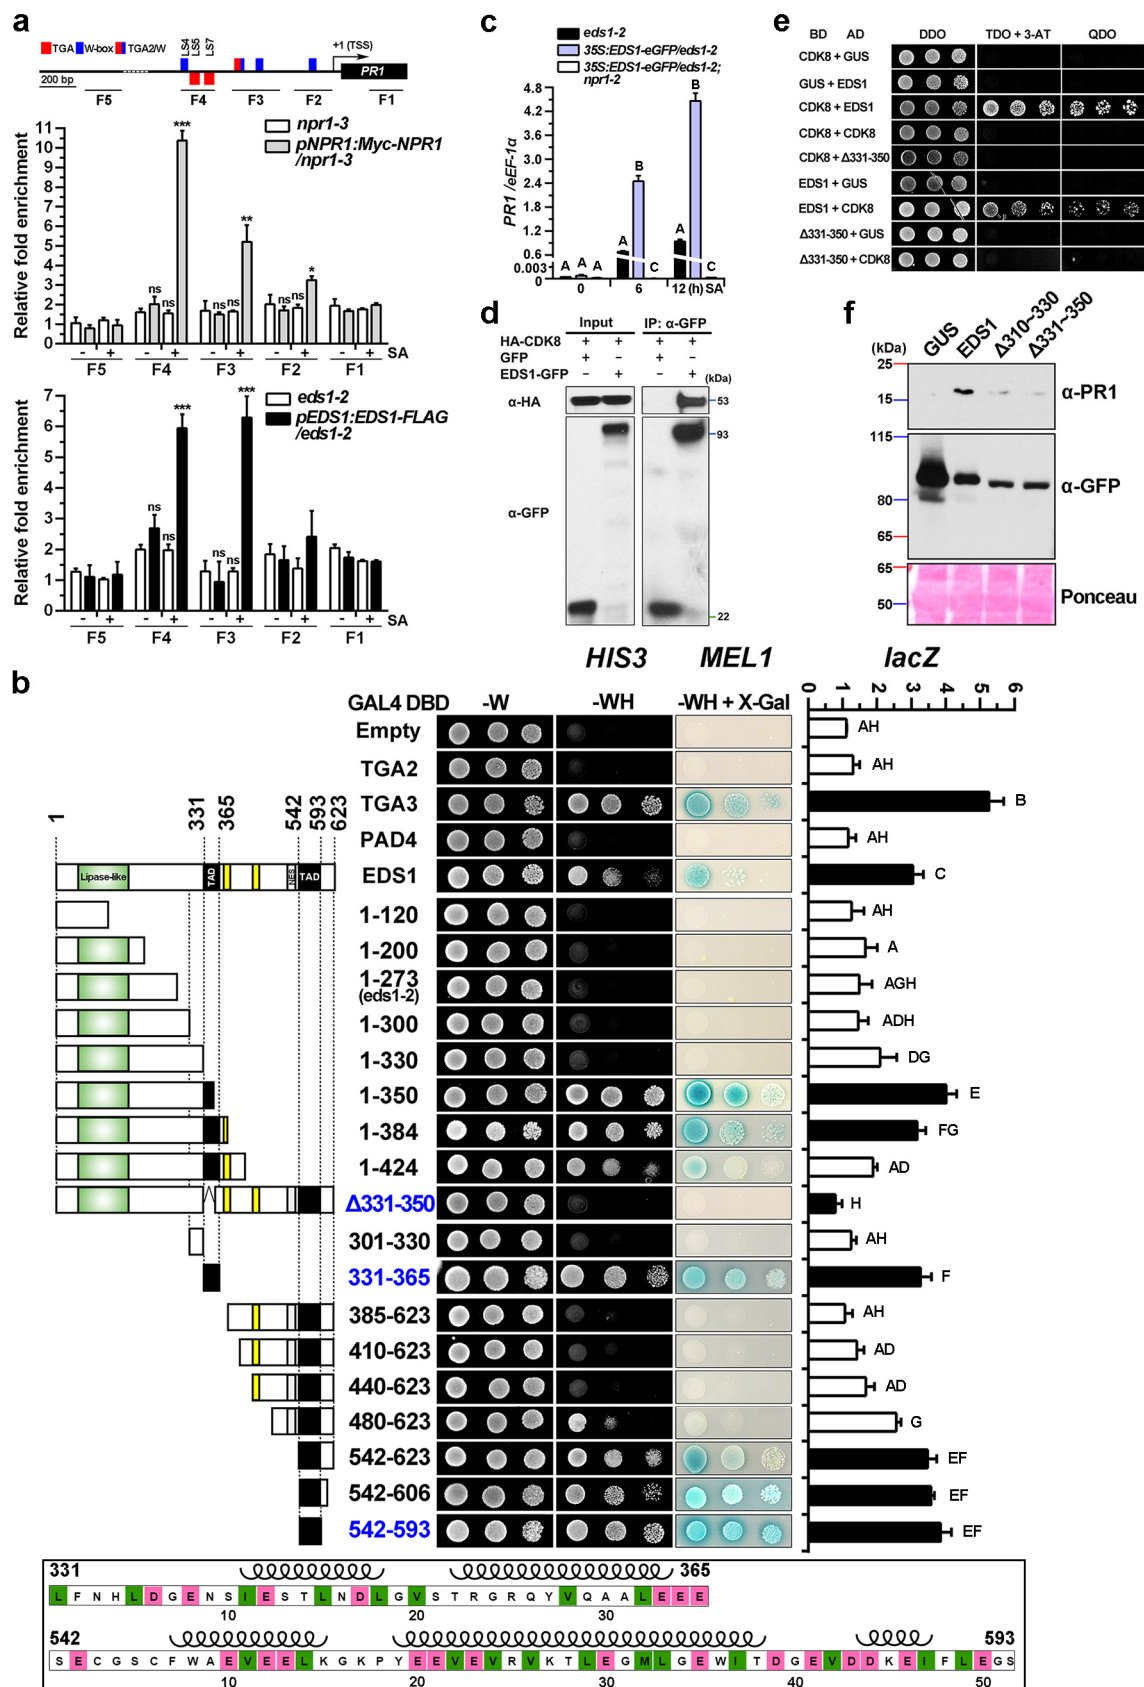

Fig. 4

952

953

954

955

(legend on next page)



956

957 **Fig. 4 | EDS1 functions as an acidic transcriptional coactivator.** **a**, The association of NPR1 and  
958 EDS1 with the *PR1* promoter depends on SA. ChIP-qPCR analysis of NPR1 and EDS1 enrichment at  
959 *PR1* genomic loci was performed with anti-Myc or anti-FLAG antibody. Plants were harvested after  
960 0.5 mM SA (+) or water (-) treatment for 9 h. Error bars indicate SD. n = 3 biologically independent  
961 samples. Significances of differences from the *npr1-2* treated with water are shown (*t*-test, \*,  $P <$   
962 0.05; \*\*,  $P <$  0.01; \*\*\*,  $P <$  0.001). Top panel, schematic representation of the *cis*-elements and  
963 chromatin fragments of amplicon in the *PR1* genomic region. Detailed positions of primers are  
964 described in Supplementary Table 1. LS4, equivalent to W-box (blue); LS5 and LS7, TGA motif  
965 (red); TGA2/W (chimeric color), TGA2 binding sites overlapping W-box; TSS, transcriptional start  
966 site. The TGA motifs with inverted consensus sequences are shown below. **b**, EDS1 functions as  
967 transcription activator with two autonomous TADs. Left panel, schematic illustration of EDS1 and the  
968 deletion mutants. Lipase-like domain (green); nuclear localization signal (yellow); NES, nuclear  
969 export signal (white); TAD, transactivation domain (solid). Middle panel, qualitative assay of yeast  
970 growth on selective media lacking tryptophan and histidine (-WH) and the media supplemented with  
971 X- $\alpha$ -Gal. Right panel, quantitative  $\beta$ -galactosidase analysis of LacZ activity. Bars denote SD of four  
972 biologically independent replicates (n = 4). Different letters indicate statistical differences ( $P <$  0.05).  
973 Low panel, sequence of two TADs in EDS1. Acidic amino acid residues such as aspartic acid (Asp/D)  
974 and glutamic acid (Glu/E) are labeled in red. Hydrophobic residues including leucine (Leu/L),  
975 isoleucine (Ile/I), valine (Val/V) and methionine (Met/M) are shown in green. Coils refer to the  
976 positions of helices in the crystal structure. Numbers indicate amino acid positions. **c**, SA-induced  
977 EDS1 activates *PR1*. Expression of *PR1* was analyzed by qRT-PCR. Four-week-old soil-grown plants  
978 were infiltrated with 0.5 mM SA solution. Bars represent SD; n = 3 biologically independent samples.  
979 Different letters indicate significant differences (two-way ANOVA,  $P <$  0.05). The statistical  
980 comparisons were made separately among different genotypes for each time point. **d,e**, EDS1 directly  
981 interacts with CDK8. *35S:HA-CDK8* was co-expressed with *35S:EDS1-GFP* or *35S:GFP* in *N.*  
982 *benthamiana*. Yeast cells were grown on DDO and selective triple dropout medium (TDO, without  
983 Leu, Trp and His) plus 1 mM 3-aminotriazole (3-AT) and QDO medium. **f**, Induction of PR1 affected  
984 by EDS1 deletion mutants. *35S:GUS-eGFP*, *35S:EDS1-eGFP*, *35S:EDS1 ( $\Delta$ 310~330)-eGFP*,  
985 *35S:EDS1 ( $\Delta$ 331~350)-eGFP* were transformed into *eds1-2* young leaves by agroinfiltration. 0.5 mM  
986 SA was applied to plants after agroinfiltration and total protein extract was subjected to  
987 immunoblotting using anti-PR1 or anti-GFP antibody.

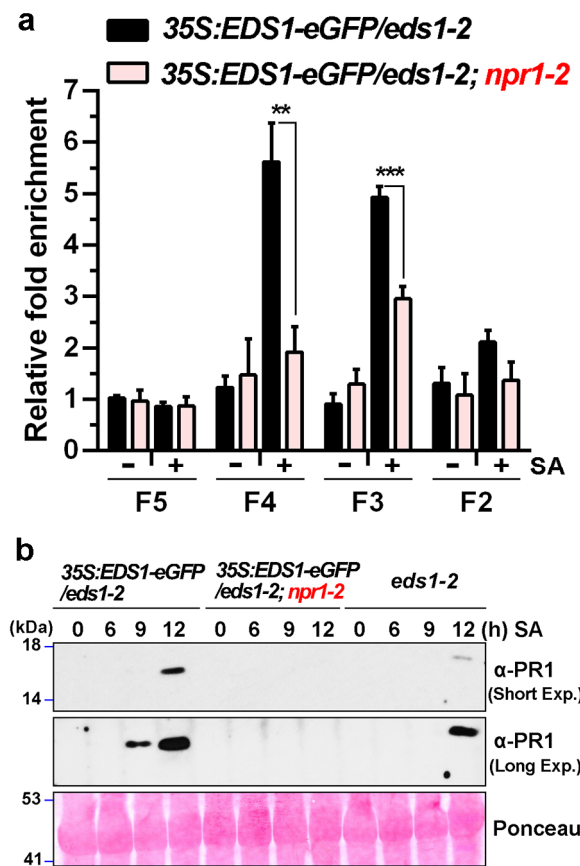

**Fig. 5**

988

989

990 **Fig. 5 | NPR1 directly recruits EDS1 onto promoter and potentiates defense responses.** **a**, NPR1  
991 directly recruits EDS1 onto *PR1* promoter. ChIP-qPCR analysis of EDS1-eGFP enrichment at *PR1*  
992 genomic loci using indicated soil-grown transgenic plants treated with foliar sprays plus soil-drenches  
993 of 0.5 mM SA (+) or water (-) for 9 h. Schematic representation of DNA fragments for amplicons are  
994 shown in Fig. 4a. **b**, EDS1 potentiates SA and NPR1-mediated PR1 protein accumulation. Leaves  
995 from soil-grown plants were infiltrated with 0.5 mM SA and collected at indicated time points. Short-  
996 and long-exposure (Exp.) images of same blot are shown. Total protein was extracted for  
997 immunoblotting using an anti-PR1 antibody. Bars indicate SD; n = 3 biologically independent  
998 samples. Significances of differences are denoted (*t*-test, \*\*,  $P < 0.01$ ; \*\*\*,  $P < 0.001$ ).

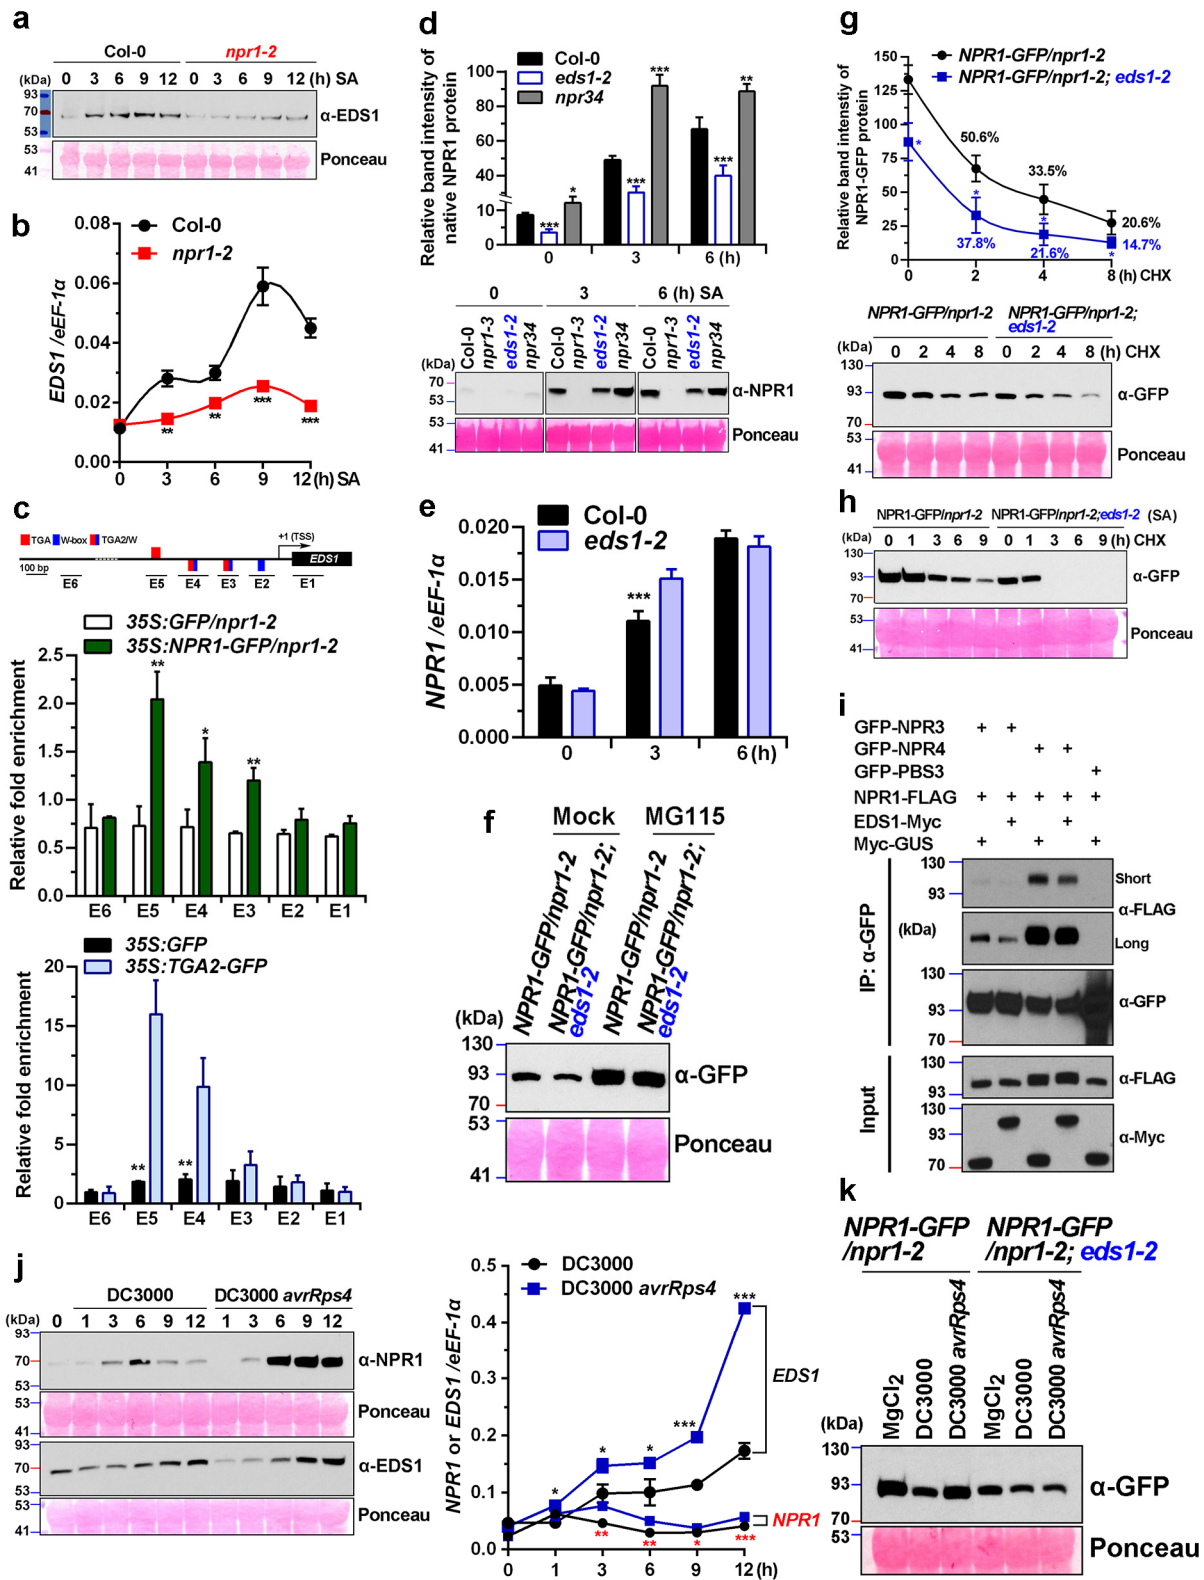

**Fig. 6**

999

1000

1001

1002

1003

1004

(legend on next page)

1005

1006 **Fig. 6 | A positive feedback loop of NPR1 and EDS1 in immune responses.** a-c, NPR1  
1007 transcriptionally regulates *EDS1*. EDS1 protein levels (a) and *EDS1* mRNA levels (b) from seedlings  
1008 treated with 0.5 mM SA solution for indicated times. ChIP analysis was performed with GFP-Trap  
1009 magnetic agarose using *NPR1-GFP* transgenic plants treated with 0.5 mM SA for 9 h (c). Upper  
1010 panel, schematic representation of the amplicons in *EDS1* genomic loci. Different *cis*-elements are  
1011 denoted as described in Fig. 4a. d-h, EDS1 stabilizes NPR1. NPR1 protein level (d) and *NPR1* mRNA  
1012 level (e) in Col-0 and *eds1-2* seedlings treated with 0.5 mM SA solution for indicated times. NPR1-  
1013 GFP protein level (f,g) in *35S:NPR1-GFP/npr1-2* and *35S:NPR1-GFP/npr1-2; eds1-2* transgenic  
1014 seedlings treated with 50  $\mu$ M MG115 or 0.2 mM cycloheximide (CHX) for indicated times. Bars  
1015 indicate  $\pm$  SE from three biologically independent experiments (g). Percentages indicate the ratio of  
1016 protein level in CHX treated plants to that of nontreated plants in each genotype. 0.2 mM CHX was  
1017 infiltrated into rosette leaves of soil-grown plants after treatment with foliar sprays of 0.5 mM SA for  
1018 12 h (h). i, *N. benthamiana* was co-transformed with indicated constructs such as *35S:GFP-*  
1019 *NPR3/4/PBS3*, *pNPR1:NPR1-3FLAG*, *pEDS1:EDS1-9Myc*, and *35S:Myc-GUS*. Co-IP assay was  
1020 performed using GFP-Trap magnetic beads and total protein was analyzed by reducing SDS-PAGE.  
1021 j,k, ETI-activated EDS1 protects NPR1 from degradation. NPR1 and EDS1 protein levels (j, left) and  
1022 their corresponding mRNA levels (j, right) in Col-0 plants infiltrated with *Pst* DC3000 or *Pst* DC3000  
1023 *avrRps4* (OD<sub>600</sub> = 0.01) for indicated times. NPR1-GFP protein level (k) in 4-week-old soil-grown  
1024 *35S:NPR1-GFP/npr1-2* and *35S:NPR1-GFP/npr1-2; eds1-2* transgenic plants infiltrated with MgCl<sub>2</sub> or  
1025 pathogens (OD<sub>600</sub> = 0.01). Bars indicate SD. n = 3 biologically independent samples (b,c,j); n = 4  
1026 biologically independent samples (d,e). Significances of differences from the control are shown for  
1027 each time point or each amplicon (*t*-test, \*,  $P < 0.05$ ; \*\*,  $P < 0.01$ ; \*\*\*,  $P < 0.001$ ). Total RNA was  
1028 extracted from 2-week-old seedlings and subjected to qPCR analysis. Total protein was analyzed by  
1029 reducing SDS-PAGE and immunoblotting using indicated antibodies.
